# Supplementary material for: Predicting novel targets with Bayesian machine learning by integrating multiple biological signatures
Source: Royal Society of Chemistry journal article supplement (doi:10.1039/d4sc03580a), 2024-01-01
Supplement: d4sc03580a1.xlsx [file d4sc03580a1.xlsx]

## Sheet: 688targets_1150drugs
drug	uniport
DB13985	P30872
DB13985	P35346
DB13985	P30874
DB13985	P32745
DB13985	P31391
DB16778	P07288
DB14914	P10636
DB16650	P29597
DB12161	Q05940
DB15873	P30874
DB15494	P30872
DB15494	P35346
DB15494	P30874
DB15494	P32745
DB13925	P30874
DB16019	P07288
DB00462	P11229
DB00462	P08172
DB00725	P20309
DB00725	P11229
DB00725	P08912
DB00725	P08173
DB00725	P08172
DB11093	P41180
DB13995	P02792
DB13995	P69905
DB13995	P02794
DB13995	P68871
DB00373	P08588
DB00373	P07550
DB13158	P04150
DB00337	P42345
DB00973	P35610
DB00973	Q9UHC9
DB14011	P21554
DB14011	P34972
DB14050	Q8NER1
DB14050	O75762
DB14050	Q9Y5S1
DB08890	P25092
DB00631	P23921
DB00631	P09884
DB09059	P30559
DB13953	P03372
DB13953	Q92731
DB02587	Q08828
DB02587	Q96PN6
DB02587	Q08462
DB02587	O60266
DB02587	Q8NFM4
DB02587	O95622
DB02587	O43306
DB02587	P51828
DB02587	P40145
DB02587	O60503
DB09401	Q02108
DB09401	P33402
DB09401	Q02153
DB09401	O75343
DB01034	P49327
DB08907	P31639
DB00227	P04035
DB00641	P04035
DB00175	P04035
DB06693	P04035
DB01229	Q9H4B7
DB01229	P10415
DB01229	P11137
DB01229	P10636
DB01229	P27816
DB06772	Q9H4B7
DB06772	P68366
DB06196	P30411
DB01426	Q14524
DB01088	P34995
DB01088	P43119
DB01240	Q9H244
DB01240	Q16647
DB01240	P43119
DB00374	Q13258
DB00374	P43116
DB00374	P43119
DB00374	Q03181
DB01180	P12821
DB00206	Q05940
DB01089	Q05940
DB00790	P12821
DB04845	Q13509
DB00318	P41143
DB00318	P41145
DB00318	P35372
DB06191	P08183
DB11699	P46098
DB00332	P20309
DB00332	P11229
DB00332	P08172
DB11181	P20309
DB11181	P11229
DB11181	P08912
DB11181	P08173
DB11181	P08172
DB00390	P05023
DB00714	P21917
DB00714	P35462
DB00714	P14416
DB00820	O76074
DB01497	P41143
DB01497	P41145
DB01497	P35372
DB00886	P08473
DB06077	Q13224
DB06077	P28223
DB06077	P31645
DB06077	P14416
DB09047	P11388
DB00444	P11388
DB00773	P11388
DB01179	P07437
DB01179	P11388
DB01179	P68366
DB06283	Q00975
DB00981	P22303
DB01020	P33402
DB09477	P12821
DB01252	Q09428
DB09054	O00329
DB09421	P34981
DB12340	P10415
DB08891	Q9UBS5
DB08891	O75899
DB14568	O75874
DB13914	Q12908
DB00385	P11388
DB00757	P46098
DB01248	Q9H4B7
DB01248	P11137
DB01248	P10636
DB01248	P27816
DB00877	P42345
DB01590	P42345
DB01396	P05023
DB00511	P05023
DB01586	P52895
DB05990	Q96RI1
DB11859	P14867
DB11859	P47869
DB11859	P34903
DB11859	P48169
DB11859	P31644
DB11859	Q16445
DB11859	P18505
DB11859	P47870
DB11859	P28472
DB11859	O14764
DB11859	P78334
DB11859	Q8N1C3
DB11859	P18507
DB11859	Q99928
DB11859	O00591
DB11859	Q9UN88
DB01126	P18405
DB01126	P31213
DB04652	P28845
DB04652	P08235
DB04652	Q15788
DB01134	P08235
DB13954	P03372
DB13954	Q92731
DB00910	P11473
DB06202	P03372
DB06202	Q92731
DB00542	P12821
DB00360	P17752
DB00360	P29474
DB00360	P07101
DB00360	P00439
DB04865	P39023
DB14062	P08183
DB13751	P06858
DB13751	P28845
DB13751	P01375
DB13751	P42574
DB13751	Q00653
DB13751	P19838
DB01395	P10275
DB01395	P06401
DB01395	P08235
DB04839	P10275
DB06335	P27487
DB09030	P25116
DB00180	P04150
DB00591	P04083
DB00591	P04150
DB00591	P07355
DB00591	P12429
DB00591	P08758
DB00591	P09525
DB01047	P04150
DB01410	P04150
DB00728	P08172
DB00728	Q15822
DB00896	P04150
DB00764	P04150
DB00240	P04150
DB01384	P04150
DB00663	P04150
DB01234	P04150
DB14649	P04150
DB13867	P04150
DB14512	P04150
DB08906	P04150
DB00588	P04150
DB00838	P04150
DB09095	P04150
DB09095	P12429
DB00547	P04150
DB00620	P04150
DB04573	P03372
DB00596	P04150
DB00223	P04150
DB00443	P04150
DB01013	P04150
DB00394	P04150
DB16756	P23458
DB00519	P12821
DB01260	P04150
DB01222	P04150
DB00288	P04150
DB00470	P21554
DB00470	P34972
DB14583	P06401
DB01046	P51788
DB00486	P21554
DB00486	P34972
DB09124	P06401
DB13857	P06401
DB01185	P03372
DB01185	P10275
DB01564	P10275
DB06412	P10275
DB06718	P10275
DB06710	P10275
DB00959	P04150
DB00860	P04150
DB00741	P04083
DB00741	P04150
DB00687	P08235
DB14541	P04083
DB14541	P04150
DB00769	P04150
DB15566	P04150
DB14539	P04083
DB14539	P04150
DB01380	P04150
DB14542	P04083
DB14542	P04150
DB09091	P04150
DB09091	Q92769
DB00324	P04150
DB12499	P10275
DB14538	P04083
DB14538	P04150
DB14540	P04083
DB14540	P04150
DB14543	P04083
DB14543	P04150
DB06781	P04150
DB14544	P04083
DB14544	P04150
DB01130	P04150
DB14596	P04150
DB00603	P03372
DB00603	P06401
DB00351	P06401
DB01092	P05023
DB00717	P06401
DB09070	P03372
DB00977	P03372
DB01357	P03372
DB04575	P03372
DB01406	P03372
DB01406	P10275
DB01406	P30968
DB01406	Q96P88
DB01406	P06401
DB00294	P06401
DB00304	P03372
DB00304	P06401
DB00367	P03372
DB00367	P18405
DB00367	P06401
DB06713	P06401
DB00834	P06401
DB00834	P04150
DB09123	P10275
DB09123	P06401
DB00957	P03372
DB00957	P06401
DB00700	P08235
DB00421	P08235
DB01216	P31213
DB00253	P04150
DB00378	P06401
DB05087	P14867
DB05087	P47869
DB05087	P34903
DB05087	P48169
DB05087	P31644
DB05087	Q16445
DB05087	P18505
DB05087	P47870
DB05087	P28472
DB05087	O14764
DB05087	P78334
DB05087	Q8N1C3
DB05087	P18507
DB05087	Q99928
DB05087	O00591
DB05087	Q9UN88
DB00396	P06401
DB00396	P08235
DB00783	P03372
DB00783	Q92731
DB00947	P03372
DB01196	P03372
DB01196	Q92731
DB01196	P11137
DB01196	P78559
DB13952	P03372
DB13952	Q92731
DB00858	P10275
DB01481	P10275
DB01108	P14060
DB01108	P26439
DB01108	P03372
DB01108	Q92731
DB01541	P10275
DB00624	P10275
DB01392	P08913
DB01392	P18825
DB01392	P18089
DB01420	P10275
DB00984	P10275
DB13943	P10275
DB13956	P03372
DB13956	Q92731
DB13944	P10275
DB08804	P10275
DB05812	P05093
DB00611	P41143
DB00611	P41145
DB00611	P35372
DB01209	P41145
DB01209	P35372
DB01336	Q15822
DB01199	P46098
DB01199	Q15822
DB00247	P08908
DB00247	P41595
DB00247	P28223
DB00247	P28335
DB00247	P34969
DB01186	P21728
DB01186	P21918
DB01186	P21917
DB01186	P35462
DB01186	P14416
DB00248	P14416
DB00589	P21917
DB00589	P28223
DB00589	P28335
DB00589	P35462
DB00589	P14416
DB01253	P35348
DB00353	P21728
DB00655	P03372
DB04574	P03372
DB01536	P14060
DB01536	P14061
DB01536	P42330
DB01120	Q09428
DB00178	P12821
DB00894	P11511
DB00854	P35372
DB00504	P35372
DB11275	P21728
DB11275	P21918
DB11275	P14416
DB11275	P35462
DB11275	P21917
DB11273	P08908
DB11273	P28222
DB11273	P28221
DB11273	P28566
DB11273	P30939
DB11273	P28223
DB11273	P41595
DB11273	P28335
DB11273	P46098
DB11273	O95264
DB11273	Q8WXA8
DB11273	Q70Z44
DB11273	A5X5Y0
DB11273	Q13639
DB11273	P50406
DB11273	P34969
DB11273	P08588
DB11273	P07550
DB11273	P13945
DB11273	P35348
DB11273	P35368
DB11273	P25100
DB11273	P08913
DB11273	P18089
DB11273	P18825
DB01200	P35462
DB01200	P14416
DB11274	P35462
DB11274	P14416
DB11274	P21728
DB11274	P21918
DB00320	P30939
DB00320	P28221
DB00320	P28222
DB00696	P28223
DB00696	P35348
DB00696	P35368
DB00696	P28221
DB00696	P25100
DB00696	P28222
DB13345	P08908
DB13345	P28222
DB13345	P28221
DB13345	P28566
DB13345	P30939
DB13345	P28223
DB13345	P41595
DB13345	P28335
DB13345	P46098
DB13345	O95264
DB13345	Q8WXA8
DB13345	Q70Z44
DB13345	A5X5Y0
DB13345	Q13639
DB13345	P50406
DB13345	P34969
DB13345	P08588
DB13345	P07550
DB13345	P13945
DB13345	P35348
DB13345	P35368
DB13345	P25100
DB13345	P08913
DB13345	P18089
DB13345	P18825
DB13345	P21728
DB13345	P21918
DB13345	P14416
DB13345	P35462
DB13345	P21917
DB00908	Q14524
DB00273	P00918
DB00273	P22748
DB00273	P14867
DB00273	P35498
DB00273	Q9Y5Y9
DB00273	Q9UI33
DB00273	Q99250
DB00273	Q9NY46
DB00273	P35499
DB00273	Q14524
DB00273	Q01118
DB00273	Q9UQD0
DB00273	Q15858
DB00273	Q13936
DB00273	Q01668
DB00273	O60840
DB00273	Q13698
DB00273	Q02641
DB00273	Q08289
DB00273	P54284
DB00273	O00305
DB00273	P39086
DB00273	Q13002
DB00273	Q13003
DB00273	Q16099
DB00273	Q16478
DB00361	P07437
DB00570	P07437
DB00570	Q71U36
DB00570	Q9UJT1
DB00570	Q9UJT0
DB00570	P23258
DB00541	P07437
DB00309	Q9H4B7
DB00466	P24046
DB00466	P14867
DB00295	P41143
DB00295	P41145
DB00295	P35372
DB00327	P41143
DB00327	P41145
DB00327	P35372
DB01192	P35372
DB00704	P41143
DB00704	P41145
DB00704	P35372
DB01548	P41143
DB01548	P35372
DB00956	P41143
DB00956	P35372
DB14146	P35372
DB01466	P35372
DB09209	P41145
DB09209	P35372
DB11691	P41143
DB11691	P41145
DB11691	P35372
DB00890	P03372
DB00875	P21728
DB00875	P28223
DB00875	P14416
DB09488	P35367
DB14069	P08183
DB13643	P14867
DB13643	P47869
DB13643	P34903
DB13643	P48169
DB13643	P31644
DB13643	Q16445
DB13643	P18505
DB13643	P47870
DB13643	P28472
DB13643	O14764
DB13643	P78334
DB13643	Q8N1C3
DB13643	P18507
DB13643	Q99928
DB13643	O00591
DB13643	Q9UN88
DB00284	O43451
DB00284	P14410
DB00284	P04746
DB11700	P32245
DB14070	P08183
DB00416	Q15822
DB01397	P23219
DB01397	P35354
DB01583	P10828
DB01583	P10827
DB09517	P02792
DB09517	P68871
DB00348	P32754
DB01219	P21817
DB01595	P14867
DB01595	P47869
DB01595	P34903
DB01595	P48169
DB01595	P31644
DB01595	Q16445
DB01595	P18505
DB01595	P47870
DB01595	P28472
DB01595	O14764
DB01595	P78334
DB01595	Q8N1C3
DB01595	P18507
DB01595	Q99928
DB01595	O00591
DB01595	Q9UN88
DB01068	P14867
DB01068	P47869
DB01068	P34903
DB01068	P48169
DB01068	P31644
DB01068	Q16445
DB01068	P18505
DB01068	P47870
DB01068	P28472
DB01068	O14764
DB01068	P78334
DB01068	Q8N1C3
DB01068	P18507
DB01068	Q99928
DB01068	O00591
DB01068	Q9UN88
DB09220	O60706
DB00732	Q15822
DB01558	P14867
DB01558	P47869
DB01558	P34903
DB01558	P48169
DB01558	P31644
DB01558	Q16445
DB01558	P18505
DB01558	P47870
DB01558	P28472
DB01558	O14764
DB01558	P78334
DB01558	Q8N1C3
DB01558	P18507
DB01558	Q99928
DB01558	O00591
DB01558	Q9UN88
DB11697	P36888
DB11697	O60674
DB00968	P08913
DB00968	P20711
DB00765	P07101
DB14639	P10275
DB00190	P20711
DB11278	P08588
DB11278	P08913
DB11278	P07550
DB11278	P13945
DB11278	P35348
DB11278	P35368
DB11278	P25100
DB11278	P18089
DB11278	P18825
DB00179	P09917
DB00179	Q96QT4
DB12941	P10275
DB00380	P11388
DB12865	P41180
DB00867	P07550
DB00867	P08588
DB00867	P13945
DB00867	P48048
DB00867	P78508
DB00867	Q14654
DB00867	Q14500
DB00867	Q9UNX9
DB00867	Q99712
DB00867	Q15842
DB00867	Q12791
DB00867	Q16558
DB00867	Q9Y691
DB00867	Q9NPA1
DB00867	Q86W47
DB00867	O15554
DB00867	Q92952
DB00867	Q9H2S1
DB00867	Q9UGI6
DB09099	P30872
DB09099	P35346
DB09099	P30874
DB09099	P32745
DB09099	P31391
DB00673	P25103
DB09291	P25103
DB16098	Q16602
DB00922	Q14654
DB00922	P63316
DB00922	Q15842
DB00278	P00734
DB08895	O60674
DB08895	P52333
DB08895	P23458
DB15444	P13569
DB01106	P35367
DB01106	O95665
DB01177	P11388
DB14017	O75533
DB00633	P08913
DB06207	P35348
DB06207	P35368
DB06207	P25100
DB00136	P11473
DB00146	P11473
DB00115	Q99707
DB00115	P22033
DB01197	P12821
DB13166	P12821
DB06707	P08913
DB06707	P18089
DB06707	P18825
DB00610	P35348
DB11952	P48736
DB11952	O00329
DB16267	O75874
DB06654	P27338
DB01208	P11388
DB06274	P35372
DB01078	P05023
DB12130	Q9UM73
DB00771	P11229
DB06800	P35372
DB01303	P30542
DB01303	Q14432
DB01303	P29274
DB01303	P27815
DB01303	Q92769
DB00986	P20309
DB00986	P11229
DB00986	P08173
DB00986	P08172
DB04843	P20309
DB04843	P11229
DB06787	P20309
DB00733	P22303
DB00733	P06276
DB06176	Q13547
DB06176	Q92769
DB09073	Q00534
DB09073	P11802
DB00414	P48048
DB01063	P14416
DB01418	Q9BQB6
DB00682	Q9BQB6
DB06151	Q9UPY5
DB06151	P48637
DB08818	P05362
DB08818	P16070
DB08818	O75330
DB00316	P23219
DB00316	P35354
DB00819	P00915
DB00819	P00918
DB00819	P22748
DB00819	O43570
DB00819	P07451
DB00819	P43166
DB00819	Q9ULX7
DB00659	Q9UBS5
DB00659	P41594
DB00659	Q05586
DB00659	Q12879
DB00659	Q13224
DB00659	Q14957
DB00659	O15399
DB00659	Q8TCU5
DB00659	O60391
DB09119	Q99571
DB08814	P35228
DB08814	P23219
DB08814	Q9Y233
DB08814	P19838
DB06209	Q9H244
DB14672	P14867
DB14672	P47869
DB14672	P34903
DB14672	P48169
DB14672	P31644
DB14672	Q16445
DB14672	P18505
DB14672	P47870
DB14672	P28472
DB14672	O14764
DB14672	P78334
DB14672	Q8N1C3
DB14672	P18507
DB14672	Q99928
DB14672	O00591
DB14672	Q9UN88
DB08806	P25021
DB01009	P35354
DB00573	P35354
DB00870	P23219
DB00870	P35354
DB09212	P23219
DB09212	P35354
DB01600	P23219
DB01600	P35354
DB08954	Q05586
DB08954	Q13224
DB00950	P35367
DB09118	P07195
DB09118	P00338
DB09118	P14867
DB09118	P47869
DB09118	P34903
DB09118	P48169
DB09118	P31644
DB09118	Q16445
DB09118	P18505
DB09118	P47870
DB09118	P28472
DB09118	O14764
DB09118	P78334
DB09118	Q8N1C3
DB09118	P18507
DB09118	Q99928
DB09118	O00591
DB09118	Q9UN88
DB08820	P13569
DB12808	P13631
DB00342	P35367
DB08912	P04049
DB08912	P15056
DB13139	P07550
DB01359	P08588
DB01359	P08908
DB01359	P07550
DB01210	P08588
DB01210	P07550
DB01407	P07550
DB01001	P07550
DB01291	P07550
DB01203	P08588
DB00521	P08588
DB00521	P07550
DB09204	P08588
DB09204	P07550
DB09204	P35348
DB09204	P35368
DB09204	P25100
DB14072	P08183
DB00212	P00797
DB11936	P53396
DB11712	P13569
DB13874	P48735
DB13873	Q07869
DB01393	Q07869
DB01393	P37231
DB01393	Q03181
DB01599	O95477
DB01070	P11473
DB00153	P11473
DB00825	O75762
DB00825	Q7Z2W7
DB00825	Q8NET8
DB00825	Q13936
DB00825	Q01668
DB00825	O60840
DB00825	Q13698
DB00825	Q02641
DB00825	Q08289
DB00825	P54284
DB00825	O00305
DB00825	O00555
DB11201	P23219
DB11201	P35354
DB04894	P35346
DB04894	P30874
DB08892	Q9UBS5
DB08892	O75899
DB00731	Q09428
DB01625	P20309
DB00782	P11229
DB05266	Q07343
DB05266	P27815
DB05266	Q08493
DB00499	P10275
DB11938	P41145
DB00230	P54289
DB00106	P30968
DB06699	P30968
DB00666	P30968
DB00666	Q96P88
DB06825	P30968
DB05624	P30968
DB00050	P30968
DB00014	P22888
DB00014	P30968
DB00188	P20618
DB00188	P28074
DB08889	P20618
DB08889	P28074
DB08889	P49721
DB08889	P28065
DB08889	P40306
DB08889	P28062
DB01076	P04035
DB06083	P35869
DB00818	P28472
DB00818	P47870
DB00818	P14867
DB00818	P47869
DB00818	P34903
DB00818	P48169
DB00818	P31644
DB00818	Q16445
DB00818	P18505
DB00818	O14764
DB00818	P78334
DB00818	Q8N1C3
DB00818	P18507
DB00818	Q99928
DB00818	O00591
DB00818	Q9UN88
DB06716	P28472
DB06716	P47870
DB01098	P04035
DB09065	P08684
DB15569	P01116
DB04835	P51681
DB00644	P30968
DB00644	Q96P88
DB01436	P11473
DB00169	P11473
DB00724	Q9NYK1
DB04854	P47989
DB05316	P28223
DB01036	P20309
DB01036	P11229
DB01036	P08912
DB01036	P08173
DB01036	P08172
DB06702	P20309
DB00280	Q14524
DB11362	P43119
DB01095	P04035
DB14921	P12883
DB14975	P69905
DB16703	Q13464
DB16703	O75116
DB00214	P55011
DB00214	Q13621
DB09351	P08588
DB01064	P08588
DB01064	P07550
DB01064	P13945
DB00816	P07550
DB00489	Q12809
DB00489	P08588
DB00489	P07550
DB01214	P08588
DB01214	P07550
DB00335	P08588
DB00195	P08588
DB00612	P08588
DB01297	P08588
DB00866	P08588
DB00866	P08908
DB00866	P07550
DB01580	P08588
DB00571	P08588
DB00960	P08588
DB00960	P07550
DB00192	Q14524
DB00287	P43088
DB08819	P43088
DB00654	P43088
DB12612	Q9H228
DB12612	P21453
DB14989	O00329
DB14989	P49674
DB09063	Q9UM73
DB08801	P35367
DB08801	P08172
DB01288	P07550
DB06814	P07550
DB00841	P08588
DB00841	P35348
DB00841	P35368
DB00841	P25100
DB06152	P48551
DB00598	P08588
DB00598	P07550
DB00598	P35348
DB00598	P35368
DB00598	P25100
DB01615	P35367
DB00744	P09917
DB01056	Q14524
DB01156	P23975
DB01156	Q01959
DB01128	P10275
DB06730	P06401
DB01030	P11387
DB11641	P07437
DB15091	P23458
DB06204	P23975
DB06204	P35372
DB00626	P14735
DB14027	P43220
DB00006	P00734
DB05885	Q7L0J3
DB05885	Q00975
DB01202	Q7L0J3
DB01202	Q00975
DB11692	P29371
DB01010	P22303
DB01010	P06276
DB00219	P11229
DB00940	P25021
DB00505	P20309
DB00505	P11229
DB00505	P08172
DB01122	P22303
DB00255	P03372
DB00255	Q92731
DB00255	P62508
DB11703	Q06187
DB15413	P15328
DB01597	P16444
DB05467	P13631
DB04942	P10826
DB04942	P10276
DB11581	P10415
DB00665	P10275
DB00846	P04150
DB09201	P37231
DB00580	P35354
DB09235	O43497
DB09235	O95180
DB09235	Q06432
DB09235	Q9Y698
DB09235	O60359
DB09235	Q9UBN1
DB09235	Q9UF02
DB09235	Q9BXT2
DB09235	P62955
DB09235	Q8WXS5
DB09235	P54289
DB09235	Q9NY47
DB09235	Q8IZS8
DB09235	Q7Z3S7
DB09235	Q13936
DB09235	Q01668
DB09235	O60840
DB09235	Q13698
DB09235	Q02641
DB09235	Q08289
DB09235	P54284
DB09235	O00305
DB09235	Q00975
DB09235	O00555
DB09235	Q15878
DB09235	Q9P0X4
DB00784	P35354
DB00140	Q969G6
DB00140	P30043
DB00197	P37231
DB00235	Q14432
DB01097	Q02127
DB00605	P35354
DB01267	P21917
DB01267	P28223
DB01267	P28335
DB01267	P35462
DB01267	P14416
DB06603	Q13547
DB06603	Q969S8
DB06603	Q96DB2
DB06603	Q92769
DB06603	O15379
DB06603	P56524
DB06603	Q9UQL6
DB06603	Q9UBN7
DB06603	Q8WUI4
DB06603	Q9BY41
DB06603	Q9UKV0
DB00152	Q9H3S4
DB00939	P23219
DB00939	P09917
DB00939	P35354
DB09216	P23219
DB09216	P35354
DB06401	P03372
DB06155	P21554
DB00165	O00764
DB05351	P20648
DB05351	P51164
DB00448	P20648
DB12015	P42336
DB00906	P30531
DB00805	P41595
DB00805	P22303
DB00805	P28223
DB00805	P28335
DB00805	P21397
DB01289	Q15842
DB01247	P27338
DB01247	P21397
DB01188	P05023
DB13931	P23975
DB13931	Q13464
DB13931	O75116
DB11652	P04626
DB08808	P08588
DB01241	Q07869
DB00323	P21964
DB00901	P07550
DB00482	P35354
DB00482	Q99519
DB00692	P08913
DB00692	P35348
DB00839	Q09428
DB00839	Q14654
DB15011	P21730
DB09280	P13569
DB01283	P23219
DB01283	P35354
DB06212	P30518
DB08807	P08588
DB04868	P00519
DB12323	P00519
DB12500	P36888
DB12500	O60674
DB01213	P07327
DB01213	P00325
DB01213	P00326
DB01213	P04040
DB04847	Q96KS0
DB04847	Q9GZT9
DB04847	Q9H6Z9
DB01349	P30556
DB01254	P00519
DB01254	P12931
DB01254	P07947
DB01254	P29317
DB01254	P06239
DB01628	P35354
DB00147	O00764
DB01067	Q09428
DB12741	Q16790
DB11951	O43613
DB11951	O43614
DB09262	P20309
DB09262	P11229
DB09262	P08172
DB00872	P37288
DB00872	P30518
DB09017	P14867
DB09017	P47869
DB09017	P34903
DB09017	P48169
DB09017	P31644
DB09017	Q16445
DB09017	P18505
DB09017	P47870
DB09017	P28472
DB09017	O14764
DB09017	P78334
DB09017	Q8N1C3
DB09017	P18507
DB09017	Q99928
DB09017	O00591
DB09017	Q9UN88
DB00404	P14867
DB00404	P47869
DB00404	P34903
DB00404	P48169
DB00404	P31644
DB00404	Q16445
DB00404	P18505
DB00404	P47870
DB00404	P28472
DB00404	O14764
DB00404	P78334
DB00404	Q8N1C3
DB00404	P18507
DB00404	Q99928
DB00404	O00591
DB00404	Q9UN88
DB00897	P14867
DB00897	P47869
DB00897	P34903
DB00897	P48169
DB00897	P31644
DB00897	Q16445
DB00897	P18505
DB00897	P47870
DB00897	P28472
DB00897	O14764
DB00897	P78334
DB00897	Q8N1C3
DB00897	P18507
DB00897	Q99928
DB00897	O00591
DB00897	Q9UN88
DB06268	P25101
DB01119	P00915
DB01119	P00918
DB01119	Q14654
DB00652	Q99720
DB00652	P41145
DB00652	P35372
DB00808	P55017
DB09224	P14416
DB15489	P14867
DB15489	P47869
DB15489	P34903
DB15489	P48169
DB15489	P31644
DB15489	Q16445
DB15489	P18505
DB15489	P47870
DB15489	P28472
DB15489	O14764
DB15489	P78334
DB15489	Q8N1C3
DB15489	P18507
DB15489	Q99928
DB15489	O00591
DB15489	Q9UN88
DB00524	P55017
DB00903	Q13621
DB00903	P05023
DB00333	P41143
DB00333	P35372
DB00333	P36544
DB00333	Q05586
DB00333	Q12879
DB00333	Q13224
DB00333	Q14957
DB00333	O15399
DB00333	Q8TCU5
DB00333	O60391
DB06738	P41143
DB06738	P41145
DB06738	P35372
DB01038	P21728
DB01038	P21918
DB01038	P14416
DB00777	P35367
DB09071	P49286
DB09071	P48039
DB00980	P49286
DB00980	P48039
DB08439	P35354
DB00492	P12821
DB00946	Q9BQB6
DB00587	Q9Y271
DB06429	P29371
DB00221	P08588
DB00189	P14867
DB00189	P47869
DB00189	P34903
DB00189	P48169
DB00189	P31644
DB00189	Q16445
DB00189	P18505
DB00189	P47870
DB00189	P28472
DB00189	O14764
DB00189	P78334
DB00189	Q8N1C3
DB00189	P18507
DB00189	Q99928
DB00189	O00591
DB00189	Q9UN88
DB05541	Q7L0J3
DB05541	P35498
DB05541	Q9Y5Y9
DB05541	Q9UI33
DB05541	Q99250
DB05541	Q9NY46
DB05541	P35499
DB05541	Q14524
DB05541	Q01118
DB05541	Q9UQD0
DB05541	Q15858
DB05541	Q07699
DB05541	O60939
DB05541	Q9NY72
DB05541	Q8IWT1
DB12016	P21453
DB01346	Q14524
DB01346	P47869
DB01346	P14867
DB00794	P47869
DB00794	P31644
DB00794	P48169
DB00794	P34903
DB00794	Q16445
DB00794	P14867
DB00794	P18505
DB00794	P47870
DB00794	P28472
DB00794	O14764
DB00794	P78334
DB00794	Q8N1C3
DB00794	P18507
DB00794	Q99928
DB00794	O00591
DB00794	Q9UN88
DB00593	O43497
DB01107	P14867
DB01107	P47869
DB01107	P34903
DB01107	P48169
DB01107	P31644
DB01107	Q16445
DB01107	P18505
DB01107	P47870
DB01107	P28472
DB01107	O14764
DB01107	P78334
DB01107	Q8N1C3
DB01107	P18507
DB01107	Q99928
DB01107	O00591
DB01107	Q9UN88
DB00357	P11511
DB00357	P05108
DB01437	P14867
DB01437	P47869
DB01437	P34903
DB01437	P48169
DB01437	P31644
DB01437	Q16445
DB01437	P18505
DB01437	P47870
DB01437	P28472
DB01437	O14764
DB01437	P78334
DB01437	Q8N1C3
DB01437	P18507
DB01437	Q99928
DB01437	O00591
DB01437	Q9UN88
DB00532	Q14524
DB00205	P00374
DB00222	Q09428
DB00222	P48048
DB00222	Q14654
DB01618	P14416
DB05039	P07550
DB12141	P36888
DB12141	Q9UM73
DB12141	P30530
DB00762	Q969P6
DB00762	P11387
DB00749	P35354
DB11363	Q9UM73
DB09166	P14867
DB09166	P47869
DB09166	P34903
DB09166	P48169
DB09166	P31644
DB09166	Q16445
DB09166	P18505
DB09166	P47870
DB09166	P28472
DB09166	O14764
DB09166	P78334
DB09166	Q8N1C3
DB09166	P18507
DB09166	Q99928
DB09166	O00591
DB09166	Q9UN88
DB01132	P37231
DB01347	P30556
DB12836	P35408
DB09389	P18405
DB09389	P06401
DB01325	P00915
DB01325	P55011
DB01325	P00918
DB01325	P55017
DB01325	Q13621
DB01193	P08588
DB00599	P47869
DB00599	P31644
DB00599	P48169
DB00599	P34903
DB00599	Q16445
DB00599	P14867
DB01154	Q14654
DB01154	P14867
DB01154	Q15842
DB16324	Q9NR97
DB09211	P43116
DB04931	Q01726
DB09300	P20309
DB00716	Q9NS75
DB00716	Q9Y271
DB00550	P07202
DB11755	P21554
DB11755	P08908
DB11755	O75762
DB11755	Q7Z2W7
DB11755	Q9Y2T6
DB11755	Q9Y5S1
DB00275	P30556
DB00862	O76074
DB00966	P30556
DB00966	P37231
DB00203	O76074
DB00177	P30556
DB08964	P43115
DB00929	P34995
DB00929	P43116
DB00929	P43115
DB00917	P34995
DB00917	P43116
DB00917	P43115
DB00917	P35408
DB00770	P34995
DB00770	P43116
DB16261	Q12908
DB16226	Q12908
DB09279	P30556
DB00678	P30556
DB00876	P30556
DB01029	P30556
DB01342	P30556
DB09061	P21554
DB09039	Q16739
DB11324	Q8NER1
DB08868	Q9H228
DB08868	P21453
DB08868	Q99500
DB13946	P10275
DB01083	P16233
DB01083	P07098
DB00308	Q12809
DB00308	Q02641
DB00308	Q13936
DB13125	P40238
DB06695	P00734
DB00710	P14324
DB00710	O95749
DB01079	Q13639
DB01101	P04818
DB01218	Q12809
DB04855	Q12809
DB04855	Q14524
DB04855	O95069
DB04855	P08913
DB04855	Q02641
DB04855	P18825
DB04855	Q13936
DB04855	P35348
DB04855	P18089
DB04855	P35368
DB04855	P51787
DB04855	P25100
DB04855	P32418
DB04855	P48549
DB04855	Q08289
DB04855	Q13698
DB04855	O00305
DB04855	O60840
DB04855	P54284
DB04855	Q01668
DB04855	Q9UK17
DB04855	Q14500
DB04855	Q9UNX9
DB04855	P63252
DB04855	P48050
DB00419	Q16739
DB01002	Q9Y5Y9
DB00297	Q9Y5Y9
DB00887	Q9H2X9
DB00887	P55011
DB00887	Q13621
DB00887	Q9UP95
DB00892	Q9Y5Y9
DB00645	Q9Y5Y9
DB13346	P23219
DB13346	P35354
DB00527	Q9Y5Y9
DB00527	Q14524
DB00775	P08514
DB00775	P05106
DB00268	P35462
DB00268	P14416
DB05271	P21917
DB05271	P35462
DB05271	P14416
DB00413	P21917
DB00413	P35462
DB00413	P14416
DB00824	P29275
DB00824	Q07343
DB00824	P27815
DB13994	P47869
DB13994	P34903
DB00750	Q14524
DB01182	Q12809
DB01182	Q14524
DB08932	P25101
DB06267	O76074
DB14973	P23458
DB08881	P15056
DB08816	Q9H244
DB11587	P07550
DB12887	Q15910
DB00494	P21964
DB00767	P20309
DB00767	P11229
DB00767	P08912
DB00767	P08173
DB00767	P35367
DB00767	P08172
DB04846	P08588
DB04846	P07550
DB00937	P23975
DB00937	Q01959
DB13967	P02768
DB00281	Q9Y5Y9
DB00281	Q14524
DB00281	Q15858
DB09288	P23219
DB09288	P21554
DB09288	P35354
DB09288	Q8NER1
DB13581	P20309
DB13581	P11229
DB13581	P08912
DB13581	P08173
DB13581	P08172
DB01062	P20309
DB01062	P11229
DB01062	P08172
DB01268	P35916
DB01268	P17948
DB01268	P36888
DB01268	P09619
DB01268	P35968
DB01268	P10721
DB01268	P16234
DB01268	P07333
DB13025	P35462
DB13025	P14416
DB13025	P08908
DB13025	P28222
DB13025	P28221
DB13025	P28566
DB13025	P30939
DB13025	P28223
DB13025	P41595
DB13025	P28335
DB13025	P46098
DB13025	O95264
DB13025	Q8WXA8
DB13025	Q70Z44
DB13025	A5X5Y0
DB13025	Q13639
DB13025	P50406
DB13025	P34969
DB13025	P35348
DB13025	P35368
DB13025	P25100
DB13025	P08913
DB13025	P18089
DB13025	P18825
DB09018	P14416
DB01233	Q13639
DB01233	P11229
DB01233	P46098
DB01233	P14416
DB04967	P11388
DB04967	P11387
DB04967	P27695
DB14061	P08183
DB00809	P11229
DB00809	P08173
DB00809	P08172
DB01611	Q9NYK1
DB01611	Q9NR96
DB00869	P00915
DB00869	P00918
DB00869	P22748
DB01194	P00918
DB14840	P09619
DB14840	P35968
DB14840	P10721
DB14840	P15056
DB14840	P16234
DB14840	Q02763
DB15102	P21802
DB15102	P11362
DB15102	P22607
DB00754	Q14524
DB00409	P14416
DB00391	P14416
DB06288	P28223
DB06288	P35462
DB06288	P34969
DB06288	P14416
DB11886	P21802
DB11886	P22455
DB11886	P11362
DB11886	P22607
DB12001	Q00534
DB12001	P11802
DB00007	P30968
DB00905	P34995
DB00905	P43088
DB00905	P43115
DB06785	P30968
DB00898	P23415
DB00898	Q8TCU5
DB00898	P23416
DB00898	P14867
DB12095	Q8IWU9
DB12095	P17752
DB09292	P08473
DB01348	P12821
DB00691	P12821
DB00881	P12821
DB00584	P12821
DB01340	P12821
DB01023	Q13936
DB01023	P54289
DB01023	Q08289
DB01023	Q13698
DB01023	Q01668
DB01054	Q13936
DB01054	P54289
DB01054	Q08289
DB01054	Q13698
DB01054	Q01668
DB09236	Q13936
DB09236	Q01668
DB09236	O60840
DB09236	Q13698
DB09236	Q02641
DB09236	Q08289
DB09236	P54284
DB09236	O00305
DB09236	O00555
DB00381	Q9P0X4
DB00381	Q13936
DB01545	P14867
DB01545	P47869
DB01545	P34903
DB01545	P48169
DB01545	P31644
DB01545	Q16445
DB01545	P18505
DB01545	P47870
DB01545	P28472
DB01545	O14764
DB01545	P78334
DB01545	Q8N1C3
DB01545	P18507
DB01545	Q99928
DB01545	O00591
DB01545	Q9UN88
DB04898	P00734
DB00680	Q14524
DB00912	Q09428
DB00912	P35367
DB11828	P00533
DB15498	P33981
DB05676	Q86V67
DB08810	P08908
DB08810	P28223
DB06292	P31639
DB11827	P31639
DB12713	P31639
DB12713	P13866
DB00706	P35348
DB00311	P00915
DB00311	P00918
DB00311	P22748
DB00311	P43166
DB16165	P08235
DB00796	P30556
DB08822	P30556
DB13919	P30556
DB11591	P35367
DB12756	Q96GD4
DB11817	O60674
DB11817	P52333
DB11817	P23458
DB00246	P08908
DB00246	P28223
DB00246	P28335
DB00246	P28221
DB00246	P14416
DB09343	P19971
DB11726	P36544
DB05490	P37231
DB01171	P21397
DB12764	Q9NRA0
DB06228	P00742
DB00261	Q14432
DB14028	P14867
DB14028	P47869
DB14028	P34903
DB14028	P48169
DB14028	P31644
DB14028	Q16445
DB14028	P18505
DB14028	P47870
DB14028	P28472
DB14028	O14764
DB14028	P78334
DB14028	Q8N1C3
DB14028	P18507
DB14028	Q99928
DB14028	O00591
DB14028	Q9UN88
DB01238	P28223
DB01238	P14416
DB01184	P35462
DB01184	P14416
DB01215	P14867
DB01215	P47869
DB01215	P34903
DB01215	P48169
DB01215	P31644
DB01215	Q16445
DB01215	P18505
DB01215	P47870
DB01215	P28472
DB01215	O14764
DB01215	P78334
DB01215	Q8N1C3
DB01215	P18507
DB01215	Q99928
DB01215	O00591
DB01215	Q9UN88
DB01511	P14867
DB01511	P47869
DB01511	P34903
DB01511	P48169
DB01511	P31644
DB01511	Q16445
DB01511	P18505
DB01511	P47870
DB01511	P28472
DB01511	O14764
DB01511	P78334
DB01511	Q8N1C3
DB01511	P18507
DB01511	Q99928
DB01511	O00591
DB01511	Q9UN88
DB01553	P14867
DB01553	P47869
DB01553	P34903
DB01553	P48169
DB01553	P31644
DB01553	Q16445
DB01553	P18505
DB01553	P47870
DB01553	P28472
DB01553	O14764
DB01553	P78334
DB01553	Q8N1C3
DB01553	P18507
DB01553	Q99928
DB01553	O00591
DB01553	Q9UN88
DB00356	Q12791
DB00262	P00390
DB14019	P25103
DB12532	P01350
DB09075	P00742
DB00836	P35372
DB16690	P05023
DB16690	P50993
DB16690	P13637
DB16690	Q13733
DB16690	P05026
DB16690	P14415
DB16690	P54709
DB16690	P54710
DB11730	Q00534
DB11730	P11802
DB05590	P07550
DB01408	P07550
DB08916	P04626
DB08916	P00533
DB08916	Q15303
DB09333	P55073
DB08867	P06401
DB08867	P04150
DB06700	P23975
DB06700	P31645
DB00768	P35367
DB00546	P14867
DB00546	P47869
DB00546	P34903
DB00546	P48169
DB00546	P31644
DB00546	Q16445
DB00546	P18505
DB00546	P47870
DB00546	P28472
DB00546	O14764
DB00546	P78334
DB00546	Q8N1C3
DB00546	P18507
DB00546	Q99928
DB00546	O00591
DB00546	Q9UN88
DB04837	P35367
DB00953	P30939
DB00953	P28221
DB00953	P28222
DB00315	P30939
DB00315	P28221
DB00315	P28222
DB01488	P50406
DB01614	P21728
DB01614	P08908
DB01614	P28223
DB01614	P14416
DB13123	P09382
DB00979	P11229
DB01621	P21728
DB01621	P08908
DB01621	P28223
DB01621	P14416
DB06589	P35916
DB06589	P17948
DB06589	P09619
DB06589	P35968
DB06589	P10721
DB06589	P16234
DB13191	P12277
DB13191	P12532
DB13191	P48029
DB13191	P17540
DB13191	Q14353
DB13191	P06732
DB00148	P12277
DB00148	P12532
DB00148	P48029
DB00148	P17540
DB00148	Q14353
DB00148	P06732
DB00293	P04818
DB00563	P04818
DB00563	P00374
DB00563	P31939
DB11855	P11229
DB11855	P08172
DB11855	P20309
DB11855	P08173
DB11855	P08912
DB09092	Q13423
DB09092	P50213
DB09092	Q02218
DB09092	P04406
DB09092	P40926
DB00412	P37231
DB00204	Q12809
DB00204	O95069
DB00204	Q14500
DB00852	P08913
DB00852	P23975
DB00852	P35348
DB00852	Q01959
DB00852	P31645
DB01364	P08588
DB01364	P35348
DB01364	P07550
DB00998	P28221
DB00998	P28222
DB00747	P20309
DB00747	P11229
DB00747	P08912
DB00747	P08173
DB00747	P08172
DB00572	P20309
DB00572	P11229
DB00572	P08912
DB00572	P08173
DB00572	P08172
DB04787	P06401
DB08911	Q02750
DB08911	P36507
DB05246	O43497
DB06725	P23219
DB06725	P35354
DB00469	P35354
DB00814	P35354
DB00554	P35354
DB01178	P30536
DB00500	P35354
DB00232	Q13621
DB01324	P55017
DB12285	P56817
DB11761	P48764
DB11689	Q02750
DB11689	P36507
DB11967	Q13233
DB11967	P36507
DB01412	P30542
DB01412	P29274
DB00231	P14867
DB00231	P47869
DB00231	P34903
DB00231	P48169
DB00231	P31644
DB00231	Q16445
DB00231	P18505
DB00231	P47870
DB00231	P28472
DB00231	O14764
DB00231	P78334
DB00231	Q8N1C3
DB00231	P18507
DB00231	Q99928
DB00231	O00591
DB00231	Q9UN88
DB13872	P14867
DB13872	P47869
DB13872	P34903
DB13872	P48169
DB13872	P31644
DB13872	Q16445
DB13872	P18505
DB13872	P47870
DB13872	P28472
DB13872	O14764
DB13872	P78334
DB13872	Q8N1C3
DB13872	P18507
DB13872	Q99928
DB13872	O00591
DB13872	Q9UN88
DB01587	P14867
DB01587	P47869
DB01587	P34903
DB01587	P48169
DB01587	P31644
DB01587	Q16445
DB01587	P18505
DB01587	P47870
DB01587	P28472
DB01587	O14764
DB01587	P78334
DB01587	Q8N1C3
DB01587	P18507
DB01587	Q99928
DB01587	O00591
DB01587	Q9UN88
DB00349	P14867
DB00349	P47869
DB00349	P34903
DB00349	P48169
DB00349	P31644
DB00349	Q16445
DB00349	P18505
DB00349	P47870
DB00349	P28472
DB00349	O14764
DB00349	P78334
DB00349	Q8N1C3
DB00349	P18507
DB00349	Q99928
DB00349	O00591
DB00349	Q9UN88
DB00904	P46098
DB00969	P46098
DB00651	P30542
DB00651	Q07343
DB00651	P29274
DB00651	P27815
DB00651	Q08499
DB00651	Q08493
DB14132	P29274
DB00277	P30542
DB00277	O76074
DB00277	P29275
DB00277	Q14432
DB00277	Q07343
DB00277	P29274
DB00277	P27815
DB00277	Q92769
DB09289	P35372
DB11978	Q99835
DB00920	P35367
DB11732	P30939
DB15688	Q16602
DB00216	P30939
DB00216	P28221
DB00216	P28222
DB01619	P35367
DB00961	Q9Y5Y9
DB00933	P28223
DB00933	P14416
DB00383	P20309
DB00383	P11229
DB00383	P08172
DB00670	P11229
DB00402	P14867
DB00402	P47869
DB00402	P34903
DB00402	P48169
DB00402	P31644
DB00402	Q16445
DB00402	P18505
DB00402	P47870
DB00402	P28472
DB00402	O14764
DB00402	P78334
DB00402	Q8N1C3
DB00402	P18507
DB00402	Q99928
DB00402	O00591
DB00402	Q9UN88
DB01198	P47869
DB01198	P31644
DB01198	P34903
DB01198	P14867
DB15327	P00533
DB15327	Q06187
DB04576	P11388
DB11986	P04629
DB11986	Q16288
DB11986	P08922
DB13164	P00533
DB11740	P30291
DB15442	Q00534
DB15442	P11802
DB00363	P28223
DB00363	P14416
[truncated: 1,200 more rows]

## Sheet: validation data
Molecule_CHEMBLID	Year	Uniportid	Target_CHEMBLID
CHEMBL3806205	2021	P21453	CHEMBL4333
CHEMBL3616752	2021	P43220	CHEMBL1784
CHEMBL4874819	2021	P07550	CHEMBL210
CHEMBL4453417	2021	Q96RI1	CHEMBL2047
CHEMBL5087859	2021	Q01726	CHEMBL3795
CHEMBL4749439	2021	Q96RI1	CHEMBL2047
CHEMBL3648354	2021	P49286	CHEMBL1946
CHEMBL4870188	2021	P36888	CHEMBL1974
CHEMBL4785930	2021	Q96RI1	CHEMBL2047
CHEMBL1218	2021	P49286	CHEMBL1946
CHEMBL45	2021	P49286	CHEMBL1946
CHEMBL4776565	2021	P15056	CHEMBL5145
CHEMBL4789639	2021	P29597	CHEMBL3553
CHEMBL4852629	2021	P07550	CHEMBL210
CHEMBL4777528	2021	P29597	CHEMBL3553
CHEMBL4799997	2021	P43166	CHEMBL2326
CHEMBL5072998	2021	P03372	CHEMBL206
CHEMBL4878395	2021	P07550	CHEMBL210
CHEMBL4854091	2021	P07550	CHEMBL210
CHEMBL4780233	2021	P29597	CHEMBL3553
CHEMBL4878159	2021	P36888	CHEMBL1974
CHEMBL4847707	2021	P03372	CHEMBL206
CHEMBL4852442	2021	P10415	CHEMBL4860
CHEMBL4861804	2021	P27338	CHEMBL2039
CHEMBL4864419	2021	O00329	CHEMBL3130
CHEMBL4860613	2021	O00329	CHEMBL3130
CHEMBL4854930	2021	P03372	CHEMBL206
CHEMBL4867414	2021	P08908	CHEMBL214
CHEMBL4560385	2021	Q06187	CHEMBL5251
CHEMBL4527563	2021	O00329	CHEMBL3130
CHEMBL4528514	2021	P03372	CHEMBL206
CHEMBL4861043	2021	O00329	CHEMBL3130
CHEMBL4859203	2021	P11362	CHEMBL3650
CHEMBL3353410	2021	P00533	CHEMBL203
CHEMBL4862016	2021	P00918	CHEMBL205
CHEMBL4865434	2021	P14416	CHEMBL217
CHEMBL5088737	2021	P21802	CHEMBL4142
CHEMBL4861612	2021	Q06187	CHEMBL5251
CHEMBL4849611	2021	P01116	CHEMBL2189121
CHEMBL4878320	2021	O00329	CHEMBL3130
CHEMBL4846823	2021	P08908	CHEMBL214
CHEMBL4872592	2021	P49286	CHEMBL1946
CHEMBL4874163	2021	O43570	CHEMBL3242
CHEMBL4858543	2021	P03372	CHEMBL206
CHEMBL4869059	2021	P36888	CHEMBL1974
CHEMBL5081077	2021	Q01726	CHEMBL3795
CHEMBL4860213	2021	P10415	CHEMBL4860
CHEMBL4864454	2021	P35372	CHEMBL233
CHEMBL80	2021	P35372	CHEMBL233
CHEMBL5083844	2021	P03372	CHEMBL206
CHEMBL1983268	2021	P04629	CHEMBL2815
CHEMBL4860626	2021	P08908	CHEMBL214
CHEMBL3911017	2021	Q15910	CHEMBL2189110
CHEMBL4869569	2021	P36888	CHEMBL1974
CHEMBL4845703	2021	P07949	CHEMBL2041
CHEMBL4796010	2021	P00533	CHEMBL203
CHEMBL4863146	2021	P22607	CHEMBL2742
CHEMBL4863732	2021	P11362	CHEMBL3650
CHEMBL4753808	2021	P35462	CHEMBL234
CHEMBL4763773	2021	P21802	CHEMBL4142
CHEMBL4858875	2021	O00329	CHEMBL3130
CHEMBL4777648	2021	P29597	CHEMBL3553
CHEMBL4860950	2021	P34972	CHEMBL253
CHEMBL4863224	2021	P22607	CHEMBL2742
CHEMBL4874010	2021	P49286	CHEMBL1946
CHEMBL4868427	2021	P10415	CHEMBL4860
CHEMBL4851637	2021	P11362	CHEMBL3650
CHEMBL4865341	2021	O00329	CHEMBL3130
CHEMBL4860305	2021	P36888	CHEMBL1974
CHEMBL4587627	2021	P22748	CHEMBL3729
CHEMBL4763430	2021	P04629	CHEMBL2815
CHEMBL4872728	2021	P48736	CHEMBL3267
CHEMBL4849522	2021	P11362	CHEMBL3650
CHEMBL4163691	2021	Q06187	CHEMBL5251
CHEMBL295388	2021	P08173	CHEMBL1821
CHEMBL4846932	2021	P30530	CHEMBL4895
CHEMBL4851075	2021	P29597	CHEMBL3553
CHEMBL4864382	2021	P36888	CHEMBL1974
CHEMBL4748361	2021	Q9UM73	CHEMBL4247
CHEMBL4854103	2021	P04629	CHEMBL2815
CHEMBL3936761	2021	Q06187	CHEMBL5251
CHEMBL2028019	2021	P14416	CHEMBL217
CHEMBL4862180	2021	P08908	CHEMBL214
CHEMBL4854151	2021	P11362	CHEMBL3650
CHEMBL4853342	2021	P14416	CHEMBL217
CHEMBL4861526	2021	P36888	CHEMBL1974
CHEMBL4851029	2021	P11362	CHEMBL3650
CHEMBL90	2021	Q9Y5N1	CHEMBL264
CHEMBL2387229	2021	P14416	CHEMBL217
CHEMBL4753590	2021	Q9UM73	CHEMBL4247
CHEMBL4865208	2021	P36888	CHEMBL1974
CHEMBL4862702	2021	P00519	CHEMBL1862
CHEMBL4867814	2021	O60674	CHEMBL2971
CHEMBL5080719	2021	P28223	CHEMBL224
CHEMBL4860030	2021	P01116	CHEMBL2189121
CHEMBL4873282	2021	P01116	CHEMBL2189121
CHEMBL4877827	2021	P14416	CHEMBL217
CHEMBL4761468	2021	P00533	CHEMBL203
CHEMBL4860754	2021	P08908	CHEMBL214
CHEMBL4877973	2021	P14416	CHEMBL217
CHEMBL4870186	2021	P22455	CHEMBL3973
CHEMBL5075712	2021	P32245	CHEMBL259
CHEMBL4863183	2021	P00918	CHEMBL205
CHEMBL4849717	2021	Q07343	CHEMBL275
CHEMBL4752394	2021	Q9H228	CHEMBL2274
CHEMBL4283353	2021	P04629	CHEMBL2815
CHEMBL4748361	2021	P08922	CHEMBL5568
CHEMBL4873467	2021	P10415	CHEMBL4860
CHEMBL4862054	2021	P36888	CHEMBL1974
CHEMBL4865118	2021	P14416	CHEMBL217
CHEMBL4878421	2021	Q06187	CHEMBL5251
CHEMBL4847626	2021	P30939	CHEMBL1805
CHEMBL4860613	2021	P48736	CHEMBL3267
CHEMBL4845947	2021	P34969	CHEMBL3155
CHEMBL4853615	2021	Q06187	CHEMBL5251
CHEMBL4475116	2021	Q9UBN7	CHEMBL1865
CHEMBL4871803	2021	P30291	CHEMBL5491
CHEMBL4853403	2021	Q06187	CHEMBL5251
CHEMBL3908950	2021	P31639	CHEMBL3884
CHEMBL1983268	2021	Q16288	CHEMBL5608
CHEMBL4238926	2021	P29597	CHEMBL3553
CHEMBL4747506	2021	Q06187	CHEMBL5251
CHEMBL4435170	2021	P29597	CHEMBL3553
CHEMBL4863980	2021	P14416	CHEMBL217
CHEMBL4871938	2021	Q9UBN7	CHEMBL1865
CHEMBL4852405	2021	P22455	CHEMBL3973
CHEMBL4860828	2021	P28223	CHEMBL224
CHEMBL4873100	2021	P08908	CHEMBL214
CHEMBL4866058	2021	P08908	CHEMBL214
CHEMBL4874090	2021	P30291	CHEMBL5491
CHEMBL4868429	2021	P03952	CHEMBL2000
CHEMBL4853913	2021	P04629	CHEMBL2815
CHEMBL4877075	2021	Q07343	CHEMBL275
CHEMBL5088601	2021	Q9UGN5	CHEMBL5366
CHEMBL328560	2021	P00918	CHEMBL205
CHEMBL4552760	2021	Q96RI1	CHEMBL2047
CHEMBL4871133	2021	P29597	CHEMBL3553
CHEMBL4740532	2021	Q15910	CHEMBL2189110
CHEMBL4743188	2021	Q9UM73	CHEMBL4247
CHEMBL4872758	2021	P03952	CHEMBL2000
CHEMBL4750939	2021	P35462	CHEMBL234
CHEMBL4787118	2021	P21554	CHEMBL218
CHEMBL5071286	2021	P35372	CHEMBL233
CHEMBL4851470	2021	P00519	CHEMBL1862
CHEMBL4862320	2021	P35462	CHEMBL234
CHEMBL4867678	2021	P08183	CHEMBL4302
CHEMBL4871192	2021	Q06187	CHEMBL5251
CHEMBL4795231	2021	P29597	CHEMBL3553
CHEMBL4797745	2021	Q96RI1	CHEMBL2047
CHEMBL340211	2021	P08908	CHEMBL214
CHEMBL4865907	2021	Q9Y5N1	CHEMBL264
CHEMBL4283353	2021	Q16288	CHEMBL5608
CHEMBL4846823	2021	P34969	CHEMBL3155
CHEMBL4878411	2021	P10415	CHEMBL4860
CHEMBL4872856	2021	P22455	CHEMBL3973
CHEMBL4849258	2021	P10721	CHEMBL1936
CHEMBL4868117	2021	P48736	CHEMBL3267
CHEMBL4852663	2021	P28223	CHEMBL224
CHEMBL4851636	2021	P00519	CHEMBL1862
CHEMBL4876697	2021	P36888	CHEMBL1974
CHEMBL4792231	2021	P29597	CHEMBL3553
CHEMBL4862017	2021	Q16288	CHEMBL5608
CHEMBL4864109	2021	P48736	CHEMBL3267
CHEMBL4878898	2021	O43570	CHEMBL3242
CHEMBL4874542	2021	P08183	CHEMBL4302
CHEMBL4854911	2021	Q06187	CHEMBL5251
CHEMBL4176953	2021	P22748	CHEMBL3729
CHEMBL4878409	2021	P01116	CHEMBL2189121
CHEMBL4785998	2021	P52333	CHEMBL2148
CHEMBL5093894	2021	P16234	CHEMBL2007
CHEMBL4749593	2021	P22607	CHEMBL2742
CHEMBL4740965	2021	P30530	CHEMBL4895
CHEMBL3110004	2021	Q9UKV0	CHEMBL4145
CHEMBL3805222	2021	O43570	CHEMBL3242
CHEMBL4876297	2021	P21917	CHEMBL219
CHEMBL3806205	2021	Q9H228	CHEMBL2274
CHEMBL4873797	2021	Q07343	CHEMBL275
CHEMBL4799997	2021	P23280	CHEMBL3025
CHEMBL4876405	2021	Q9UBN7	CHEMBL1865
CHEMBL4760892	2021	O60674	CHEMBL2971
CHEMBL4865907	2021	P08908	CHEMBL214
CHEMBL4787118	2021	P34972	CHEMBL253
CHEMBL4869612	2021	P03372	CHEMBL206
CHEMBL4859571	2021	P35354	CHEMBL230
CHEMBL4799997	2021	P00918	CHEMBL205
CHEMBL19439	2021	Q9Y5N1	CHEMBL264
CHEMBL4799019	2021	P29597	CHEMBL3553
CHEMBL4594298	2021	P08183	CHEMBL4302
CHEMBL4868609	2021	P36888	CHEMBL1974
CHEMBL4759697	2021	P04626	CHEMBL1824
CHEMBL4878501	2021	P35462	CHEMBL234
CHEMBL4799559	2021	P29597	CHEMBL3553
CHEMBL4865389	2021	P14416	CHEMBL217
CHEMBL4862399	2021	P35462	CHEMBL234
CHEMBL4859469	2021	O00329	CHEMBL3130
CHEMBL4759162	2021	Q16288	CHEMBL5608
CHEMBL4753808	2021	P28223	CHEMBL224
CHEMBL4869198	2021	P14416	CHEMBL217
CHEMBL4799997	2021	Q8N1Q1	CHEMBL3912
CHEMBL4868440	2021	Q16790	CHEMBL3594
CHEMBL5089022	2021	P15056	CHEMBL5145
CHEMBL2028019	2021	P28223	CHEMBL224
CHEMBL4862563	2021	Q9UBN7	CHEMBL1865
CHEMBL4848305	2021	P34969	CHEMBL3155
CHEMBL5070312	2021	O15379	CHEMBL1829
CHEMBL4756105	2021	O43570	CHEMBL3242
CHEMBL5083186	2021	P35372	CHEMBL233
CHEMBL4853960	2021	O00329	CHEMBL3130
CHEMBL4798111	2021	Q8WUI4	CHEMBL2716
CHEMBL4848530	2021	P11362	CHEMBL3650
CHEMBL4865591	2021	P08908	CHEMBL214
CHEMBL4873003	2021	P11362	CHEMBL3650
CHEMBL4762176	2021	Q16288	CHEMBL5608
CHEMBL4782487	2021	P04629	CHEMBL2815
CHEMBL4858238	2021	Q96RI1	CHEMBL2047
CHEMBL4868440	2021	O43570	CHEMBL3242
CHEMBL4856809	2021	Q07343	CHEMBL275
CHEMBL5075506	2021	P32245	CHEMBL259
CHEMBL3289648	2021	P21917	CHEMBL219
CHEMBL4865907	2021	P35462	CHEMBL234
CHEMBL4750939	2021	P14416	CHEMBL217
CHEMBL1946124	2021	P31645	CHEMBL228
CHEMBL4860576	2021	P30939	CHEMBL1805
CHEMBL4852863	2021	P48736	CHEMBL3267
CHEMBL4852080	2021	O60674	CHEMBL2971
CHEMBL4862016	2021	Q16790	CHEMBL3594
CHEMBL4756105	2021	P00918	CHEMBL205
CHEMBL4849074	2021	P01116	CHEMBL2189121
CHEMBL4863574	2021	P00519	CHEMBL1862
CHEMBL4868355	2021	Q06187	CHEMBL5251
CHEMBL4868150	2021	O00329	CHEMBL3130
CHEMBL4748500	2021	P56524	CHEMBL3524
CHEMBL4863868	2021	P34969	CHEMBL3155
CHEMBL4743601	2021	P28062	CHEMBL5620
CHEMBL4793296	2021	P21917	CHEMBL219
CHEMBL4856418	2021	O00329	CHEMBL3130
CHEMBL4862757	2021	P00918	CHEMBL205
CHEMBL4875500	2021	Q96RI1	CHEMBL2047
CHEMBL4847875	2021	P09619	CHEMBL1913
CHEMBL4784391	2021	P29597	CHEMBL3553
CHEMBL4877277	2021	P28065	CHEMBL1944495
CHEMBL4783205	2021	Q96RI1	CHEMBL2047
CHEMBL4869122	2021	P35462	CHEMBL234
CHEMBL4861553	2021	P14416	CHEMBL217
CHEMBL238915	2021	P21917	CHEMBL219
CHEMBL4745371	2021	Q16288	CHEMBL5608
CHEMBL4854896	2021	P03952	CHEMBL2000
CHEMBL4866028	2021	P36888	CHEMBL1974
CHEMBL4871207	2021	P35354	CHEMBL230
CHEMBL4865722	2021	P11362	CHEMBL3650
CHEMBL1946124	2021	P21917	CHEMBL219
CHEMBL4788418	2021	Q16288	CHEMBL5608
CHEMBL4879303	2021	P11362	CHEMBL3650
CHEMBL4799997	2021	Q9ULX7	CHEMBL3510
CHEMBL4760977	2021	P28062	CHEMBL5620
CHEMBL4745371	2021	P04629	CHEMBL2815
CHEMBL4792694	2021	P29597	CHEMBL3553
CHEMBL4862087	2021	P11229	CHEMBL216
CHEMBL4866058	2021	P34969	CHEMBL3155
CHEMBL340211	2021	P28223	CHEMBL224
CHEMBL4848474	2021	Q07343	CHEMBL275
CHEMBL4792695	2021	P21554	CHEMBL218
CHEMBL4845768	2021	O75874	CHEMBL2007625
CHEMBL4785998	2021	P29597	CHEMBL3553
CHEMBL4862016	2021	O43570	CHEMBL3242
CHEMBL4762512	2021	Q8WUI4	CHEMBL2716
CHEMBL4872328	2021	O00329	CHEMBL3130
CHEMBL4778629	2021	Q16288	CHEMBL5608
CHEMBL4856927	2021	Q9UM73	CHEMBL4247
CHEMBL3805919	2021	O43570	CHEMBL3242
CHEMBL4871133	2021	O60674	CHEMBL2971
CHEMBL4856577	2021	O43570	CHEMBL3242
CHEMBL3289648	2021	P34969	CHEMBL3155
CHEMBL4852786	2021	Q9UM73	CHEMBL4247
CHEMBL4799577	2021	P28062	CHEMBL5620
CHEMBL4749833	2021	P28062	CHEMBL5620
CHEMBL4853186	2021	O43570	CHEMBL3242
CHEMBL5080054	2021	P04049	CHEMBL1906
CHEMBL4788418	2021	P04629	CHEMBL2815
CHEMBL4846941	2021	Q96RI1	CHEMBL2047
CHEMBL4878102	2021	Q06187	CHEMBL5251
CHEMBL396778	2021	P27338	CHEMBL2039
CHEMBL4783777	2021	Q96RI1	CHEMBL2047
CHEMBL4869419	2021	Q9UBN7	CHEMBL1865
CHEMBL4847161	2021	O43570	CHEMBL3242
CHEMBL4863183	2021	P00915	CHEMBL261
CHEMBL4794207	2021	P28062	CHEMBL5620
CHEMBL4878898	2021	P43166	CHEMBL2326
CHEMBL5088070	2021	P35462	CHEMBL234
CHEMBL4865015	2021	P28074	CHEMBL4662
CHEMBL1946124	2021	P34969	CHEMBL3155
CHEMBL4871980	2021	P34969	CHEMBL3155
CHEMBL4799997	2021	P22748	CHEMBL3729
CHEMBL4862887	2021	Q08499	CHEMBL288
CHEMBL4862580	2021	Q16288	CHEMBL5608
CHEMBL4873470	2021	P08183	CHEMBL4302
CHEMBL4862827	2021	P10275	CHEMBL1871
CHEMBL4848305	2021	P08908	CHEMBL214
CHEMBL4780335	2021	P28223	CHEMBL224
CHEMBL4862180	2021	P34969	CHEMBL3155
CHEMBL4845766	2021	O43570	CHEMBL3242
CHEMBL238917	2021	P21917	CHEMBL219
CHEMBL4862180	2021	P35462	CHEMBL234
CHEMBL4868053	2021	O00329	CHEMBL3130
CHEMBL4852663	2021	P08908	CHEMBL214
CHEMBL4868291	2021	P11362	CHEMBL3650
CHEMBL4780335	2021	P35367	CHEMBL231
CHEMBL4788418	2021	Q16620	CHEMBL4898
CHEMBL4871667	2021	P23219	CHEMBL221
CHEMBL4799406	2021	Q9BY41	CHEMBL3192
CHEMBL5093355	2021	P15056	CHEMBL5145
CHEMBL4848929	2021	P22748	CHEMBL3729
CHEMBL4847691	2021	P30530	CHEMBL4895
CHEMBL4863183	2021	O43570	CHEMBL3242
CHEMBL5072852	2021	P07333	CHEMBL1844
CHEMBL4878271	2021	P08908	CHEMBL214
CHEMBL4875079	2021	P08908	CHEMBL214
CHEMBL4868291	2021	P21802	CHEMBL4142
CHEMBL4876545	2021	P34969	CHEMBL3155
CHEMBL4793296	2021	P08908	CHEMBL214
CHEMBL4849203	2021	P08183	CHEMBL4302
CHEMBL4878774	2021	P30530	CHEMBL4895
CHEMBL4791462	2021	P22455	CHEMBL3973
CHEMBL4796905	2021	Q9UBN7	CHEMBL1865
CHEMBL4877973	2021	P08908	CHEMBL214
CHEMBL5070239	2021	P11362	CHEMBL3650
CHEMBL4780335	2021	P35462	CHEMBL234
CHEMBL4853186	2021	P00915	CHEMBL261
CHEMBL4875709	2021	P14416	CHEMBL217
CHEMBL4866058	2021	P28223	CHEMBL224
CHEMBL3110004	2021	Q9UQL6	CHEMBL2563
CHEMBL3593765	2021	P29597	CHEMBL3553
CHEMBL340211	2021	P34969	CHEMBL3155
CHEMBL4856641	2021	P36888	CHEMBL1974
CHEMBL4853953	2021	Q06187	CHEMBL5251
CHEMBL4869059	2021	P17948	CHEMBL1868
CHEMBL4865102	2021	P23458	CHEMBL2835
CHEMBL4877831	2021	O00329	CHEMBL3130
CHEMBL4863920	2021	P14416	CHEMBL217
CHEMBL4870437	2021	Q06187	CHEMBL5251
CHEMBL4864581	2021	O75874	CHEMBL2007625
CHEMBL4851021	2021	P06239	CHEMBL258
CHEMBL4763662	2021	Q9UBN7	CHEMBL1865
CHEMBL4866358	2021	P36888	CHEMBL1974
CHEMBL4855710	2021	Q9UBN7	CHEMBL1865
CHEMBL4787753	2021	P32245	CHEMBL259
CHEMBL4857459	2021	Q06187	CHEMBL5251
CHEMBL4752663	2021	Q8WUI4	CHEMBL2716
CHEMBL4877058	2021	P30530	CHEMBL4895
CHEMBL4466435	2021	Q08499	CHEMBL288
CHEMBL4793296	2021	P35462	CHEMBL234
CHEMBL4876579	2021	P10275	CHEMBL1871
CHEMBL4850334	2021	P36888	CHEMBL1974
CHEMBL4871640	2021	Q06187	CHEMBL5251
CHEMBL4860297	2021	Q16790	CHEMBL3594
CHEMBL4780858	2021	P11229	CHEMBL216
CHEMBL3289648	2021	P35462	CHEMBL234
CHEMBL4846148	2021	O60674	CHEMBL2971
CHEMBL4859284	2021	P28074	CHEMBL4662
CHEMBL5080570	2021	P21802	CHEMBL4142
CHEMBL4872713	2021	P14416	CHEMBL217
CHEMBL4787322	2021	P32245	CHEMBL259
CHEMBL4862580	2021	Q16620	CHEMBL4898
CHEMBL191482	2021	Q9BY41	CHEMBL3192
CHEMBL4877347	2021	P36888	CHEMBL1974
CHEMBL238915	2021	P14416	CHEMBL217
CHEMBL4851052	2021	P10275	CHEMBL1871
CHEMBL4298169	2021	Q96RI1	CHEMBL2047
CHEMBL4793115	2021	P31639	CHEMBL3884
CHEMBL4470487	2021	P28223	CHEMBL224
CHEMBL4878271	2021	Q9Y5N1	CHEMBL264
CHEMBL1946124	2021	P28223	CHEMBL224
CHEMBL4860828	2021	Q9Y5N1	CHEMBL264
CHEMBL4872822	2021	O00329	CHEMBL3130
CHEMBL4878774	2021	P36888	CHEMBL1974
CHEMBL4846823	2021	P28223	CHEMBL224
CHEMBL4846002	2021	Q96RI1	CHEMBL2047
CHEMBL4746111	2021	Q9UBN7	CHEMBL1865
CHEMBL4847825	2021	P36888	CHEMBL1974
CHEMBL4747442	2021	P54289	CHEMBL1919
CHEMBL5087543	2021	P35462	CHEMBL234
CHEMBL5078889	2021	P04049	CHEMBL1906
CHEMBL4854874	2021	P36888	CHEMBL1974
CHEMBL4878359	2021	O00329	CHEMBL3130
CHEMBL4861278	2021	P10275	CHEMBL1871
CHEMBL4877720	2021	Q06187	CHEMBL5251
CHEMBL4784844	2021	Q8WUI4	CHEMBL2716
CHEMBL4878459	2021	Q06187	CHEMBL5251
CHEMBL4861273	2021	P10275	CHEMBL1871
CHEMBL4865454	2021	Q96RI1	CHEMBL2047
CHEMBL2387229	2021	P50406	CHEMBL3371
CHEMBL340211	2021	P14416	CHEMBL217
CHEMBL4851909	2021	P03952	CHEMBL2000
CHEMBL4787300	2021	P28062	CHEMBL5620
CHEMBL4875079	2021	P28335	CHEMBL225
CHEMBL5072570	2021	P04049	CHEMBL1906
CHEMBL4867560	2021	P34969	CHEMBL3155
CHEMBL4871980	2021	P08908	CHEMBL214
CHEMBL4761494	2021	P22455	CHEMBL3973
CHEMBL4848999	2021	P36888	CHEMBL1974
CHEMBL5082994	2021	P11362	CHEMBL3650
CHEMBL4851097	2021	P30530	CHEMBL4895
CHEMBL4849169	2021	P36888	CHEMBL1974
CHEMBL4865591	2021	P28223	CHEMBL224
CHEMBL4864866	2021	Q08499	CHEMBL288
CHEMBL4873426	2021	P11229	CHEMBL216
CHEMBL4860581	2021	Q02127	CHEMBL1966
CHEMBL4872713	2021	P28223	CHEMBL224
CHEMBL4853429	2021	P10275	CHEMBL1871
CHEMBL4852364	2021	P15056	CHEMBL5145
CHEMBL4846148	2021	P23458	CHEMBL2835
CHEMBL4747442	2021	P23975	CHEMBL222
CHEMBL4853754	2021	P10275	CHEMBL1871
CHEMBL4750148	2021	P09874	CHEMBL3105
CHEMBL4776340	2021	P32245	CHEMBL259
CHEMBL328560	2021	P00915	CHEMBL261
CHEMBL4874067	2021	Q08499	CHEMBL288
CHEMBL4866053	2021	P31645	CHEMBL228
CHEMBL4848851	2021	P03952	CHEMBL2000
CHEMBL4875352	2021	P36888	CHEMBL1974
CHEMBL4847256	2021	P30530	CHEMBL4895
CHEMBL4876297	2021	P35462	CHEMBL234
CHEMBL4799851	2021	P08908	CHEMBL214
CHEMBL4756923	2021	Q16288	CHEMBL5608
CHEMBL1946124	2021	P08908	CHEMBL214
CHEMBL4875079	2021	P34969	CHEMBL3155
CHEMBL4850003	2021	P10275	CHEMBL1871
CHEMBL4848248	2021	P30530	CHEMBL4895
CHEMBL4879280	2021	P28065	CHEMBL1944495
CHEMBL4765104	2021	P22455	CHEMBL3973
CHEMBL191482	2021	Q8WUI4	CHEMBL2716
CHEMBL4864983	2021	P00533	CHEMBL203
CHEMBL4855775	2021	P14416	CHEMBL217
CHEMBL5072449	2021	P35372	CHEMBL233
CHEMBL4862563	2021	Q8WUI4	CHEMBL2716
CHEMBL4873501	2021	P06276	CHEMBL1914
CHEMBL4865591	2021	P21917	CHEMBL219
CHEMBL4868446	2021	P35354	CHEMBL230
CHEMBL2028019	2021	P21917	CHEMBL219
CHEMBL5092310	2021	P22607	CHEMBL2742
CHEMBL4871016	2021	O00329	CHEMBL3130
CHEMBL4862180	2021	P28223	CHEMBL224
CHEMBL4865887	2021	Q08499	CHEMBL288
CHEMBL4862399	2021	P14416	CHEMBL217
CHEMBL4845766	2021	P00915	CHEMBL261
CHEMBL4872571	2021	P30939	CHEMBL1805
CHEMBL4865907	2021	P28335	CHEMBL225
CHEMBL4860754	2021	P28223	CHEMBL224
CHEMBL1946124	2021	P35462	CHEMBL234
CHEMBL4849169	2021	P30530	CHEMBL4895
CHEMBL4847766	2021	O76074	CHEMBL1827
CHEMBL4788993	2021	P28062	CHEMBL5620
CHEMBL4850951	2021	O00329	CHEMBL3130
CHEMBL4862121	2021	P08183	CHEMBL4302
CHEMBL4858977	2021	Q96RI1	CHEMBL2047
CHEMBL4861336	2021	Q8WUI4	CHEMBL2716
CHEMBL4740302	2021	Q96EB6	CHEMBL4506
CHEMBL4867978	2021	P28335	CHEMBL225
CHEMBL4753007	2021	P08581	CHEMBL3717
CHEMBL4776825	2021	Q8WUI4	CHEMBL2716
CHEMBL5076794	2021	O15379	CHEMBL1829
CHEMBL4846435	2021	Q9UKV0	CHEMBL4145
CHEMBL4743671	2021	Q96EB6	CHEMBL4506
CHEMBL4861413	2021	P01116	CHEMBL2189121
CHEMBL4869059	2021	P07333	CHEMBL1844
CHEMBL4799851	2021	P14416	CHEMBL217
CHEMBL4749465	2021	O95749	CHEMBL4769
CHEMBL4565558	2021	P28223	CHEMBL224
CHEMBL4856664	2021	Q06187	CHEMBL5251
CHEMBL4565558	2021	P50406	CHEMBL3371
CHEMBL4872856	2021	P11362	CHEMBL3650
CHEMBL4853743	2021	Q07869	CHEMBL239
CHEMBL4867813	2021	Q08499	CHEMBL288
CHEMBL4782498	2021	P23975	CHEMBL222
CHEMBL4875288	2021	P08183	CHEMBL4302
CHEMBL4848432	2021	Q9UBN7	CHEMBL1865
CHEMBL4788107	2021	P42336	CHEMBL4005
CHEMBL4862742	2021	P11362	CHEMBL3650
CHEMBL4845838	2021	P14416	CHEMBL217
CHEMBL4846941	2021	P08684	CHEMBL340
CHEMBL4856702	2021	P28221	CHEMBL1983
CHEMBL4875181	2021	P14416	CHEMBL217
CHEMBL4856228	2021	P00915	CHEMBL261
CHEMBL4848190	2021	P35354	CHEMBL230
CHEMBL4863868	2021	P08908	CHEMBL214
CHEMBL4850964	2021	P15056	CHEMBL5145
CHEMBL4859637	2021	P13569	CHEMBL4051
CHEMBL4853797	2021	P13569	CHEMBL4051
CHEMBL4754564	2021	O95749	CHEMBL4769
CHEMBL4760782	2021	Q9UGN5	CHEMBL5366
CHEMBL4852427	2021	P10275	CHEMBL1871
CHEMBL4870613	2021	P10275	CHEMBL1871
CHEMBL1946124	2021	P14416	CHEMBL217
CHEMBL4863868	2021	P41595	CHEMBL1833
CHEMBL4847663	2021	Q9BY41	CHEMBL3192
CHEMBL4854297	2021	Q13464	CHEMBL3231
CHEMBL5075134	2021	P00734	CHEMBL204
CHEMBL4875079	2021	P14416	CHEMBL217
CHEMBL4874095	2021	Q06187	CHEMBL5251
CHEMBL4866882	2021	Q9UBN7	CHEMBL1865
CHEMBL4793296	2021	P14416	CHEMBL217
CHEMBL4869663	2021	O76074	CHEMBL1827
CHEMBL4514636	2021	P21802	CHEMBL4142
CHEMBL4870685	2021	P08581	CHEMBL3717
CHEMBL8412	2021	P14416	CHEMBL217
CHEMBL4785949	2021	P22607	CHEMBL2742
CHEMBL4853930	2021	Q03181	CHEMBL3979
CHEMBL5079163	2021	P22607	CHEMBL2742
CHEMBL4863868	2021	P50406	CHEMBL3371
CHEMBL4873768	2021	P28074	CHEMBL4662
CHEMBL4846624	2021	O00329	CHEMBL3130
CHEMBL4853858	2021	Q08499	CHEMBL288
CHEMBL4536605	2021	Q9UQL6	CHEMBL2563
CHEMBL4545246	2021	Q8WUI4	CHEMBL2716
CHEMBL5082650	2021	P14416	CHEMBL217
CHEMBL4874942	2021	Q96DB2	CHEMBL3310
CHEMBL4785360	2021	Q9UGN5	CHEMBL5366
CHEMBL4855700	2021	P30530	CHEMBL4895
CHEMBL4876297	2021	P28335	CHEMBL225
CHEMBL2387229	2021	P28335	CHEMBL225
CHEMBL4750148	2021	Q9UGN5	CHEMBL5366
CHEMBL4845711	2021	P14416	CHEMBL217
CHEMBL4852973	2021	P22748	CHEMBL3729
CHEMBL4875270	2021	P10275	CHEMBL1871
CHEMBL18797	2021	P35354	CHEMBL230
CHEMBL4875992	2021	P27338	CHEMBL2039
CHEMBL4751128	2021	Q9UGN5	CHEMBL5366
CHEMBL4866102	2021	P04049	CHEMBL1906
CHEMBL4639886	2021	Q13464	CHEMBL3231
CHEMBL4858720	2021	P11362	CHEMBL3650
CHEMBL4536605	2021	P56524	CHEMBL3524
CHEMBL4514636	2021	P22607	CHEMBL2742
CHEMBL4874716	2021	P56524	CHEMBL3524
CHEMBL4856702	2021	P34969	CHEMBL3155
CHEMBL4867560	2021	P41595	CHEMBL1833
CHEMBL4866412	2021	P34969	CHEMBL3155
CHEMBL5079163	2021	P21802	CHEMBL4142
CHEMBL4742829	2021	Q96EB6	CHEMBL4506
CHEMBL2103837	2021	P02766	CHEMBL3194
CHEMBL4860626	2021	P50406	CHEMBL3371
CHEMBL4873100	2021	P34969	CHEMBL3155
CHEMBL3289648	2021	P31645	CHEMBL228
CHEMBL4852964	2021	Q9UGN5	CHEMBL5366
CHEMBL4845947	2021	P28223	CHEMBL224
CHEMBL3927064	2021	O76074	CHEMBL1827
CHEMBL4877300	2021	Q9UKV0	CHEMBL4145
CHEMBL4763455	2021	P35354	CHEMBL230
CHEMBL4536605	2021	Q9UKV0	CHEMBL4145
CHEMBL4786867	2021	P09874	CHEMBL3105
CHEMBL4788983	2021	Q96EB6	CHEMBL4506
CHEMBL4749146	2021	Q8WUI4	CHEMBL2716
CHEMBL4762828	2021	Q96EB6	CHEMBL4506
CHEMBL4877805	2021	P56524	CHEMBL3524
CHEMBL4878413	2021	P48736	CHEMBL3267
CHEMBL3907723	2021	P21554	CHEMBL218
CHEMBL63	2021	Q08499	CHEMBL288
CHEMBL4848052	2021	Q07869	CHEMBL239
CHEMBL4859469	2021	P48736	CHEMBL3267
CHEMBL4876545	2021	P28223	CHEMBL224
CHEMBL4858808	2021	P10415	CHEMBL4860
CHEMBL4863108	2021	P00747	CHEMBL1801
CHEMBL4067391	2021	Q9NYK1	CHEMBL5936
CHEMBL4747321	2021	P35354	CHEMBL230
CHEMBL4878870	2021	P48736	CHEMBL3267
CHEMBL4740965	2021	P36888	CHEMBL1974
CHEMBL4852230	2021	Q07869	CHEMBL239
CHEMBL4846435	2021	Q96DB2	CHEMBL3310
CHEMBL4853605	2021	Q07869	CHEMBL239
CHEMBL4877300	2021	P56524	CHEMBL3524
CHEMBL4862563	2021	O15379	CHEMBL1829
CHEMBL4873100	2021	P28223	CHEMBL224
CHEMBL4748500	2021	Q9UBN7	CHEMBL1865
CHEMBL4747591	2021	P52333	CHEMBL2148
CHEMBL4858210	2021	Q9UKV0	CHEMBL4145
CHEMBL4852387	2021	P00747	CHEMBL1801
CHEMBL4847680	2021	P07949	CHEMBL2041
CHEMBL3926786	2021	O76074	CHEMBL1827
CHEMBL4846544	2021	P22748	CHEMBL3729
CHEMBL4746964	2021	Q96RI1	CHEMBL2047
CHEMBL4073879	2021	Q9NYK1	CHEMBL5936
CHEMBL4761741	2021	P31939	CHEMBL2518
CHEMBL4290314	2021	Q9NYK1	CHEMBL5936
CHEMBL4862563	2021	Q969S8	CHEMBL5103
CHEMBL4848052	2021	Q03181	CHEMBL3979
CHEMBL356769	2021	Q8WUI4	CHEMBL2716
CHEMBL20	2022	Q16790	CHEMBL3594
CHEMBL490	2021	P31645	CHEMBL228
CHEMBL4447340	2021	P03372	CHEMBL206
CHEMBL4852159	2021	P18825	CHEMBL1916
CHEMBL282199	2021	P34969	CHEMBL3155
CHEMBL4850816	2021	Q06187	CHEMBL5251
CHEMBL135	2021	P03372	CHEMBL206
CHEMBL584744	2021	P51681	CHEMBL274
CHEMBL407	2021	P47869	CHEMBL4956
CHEMBL750	2021	P43166	CHEMBL2326
CHEMBL20	2021	P00918	CHEMBL205
CHEMBL4874744	2021	P01116	CHEMBL2189121
CHEMBL2103840	2021	P11802	CHEMBL331
CHEMBL8706	2021	P21397	CHEMBL1951
CHEMBL1818254	2021	P03372	CHEMBL206
CHEMBL4845707	2021	P21554	CHEMBL218
CHEMBL434	2021	P08588	CHEMBL213
CHEMBL388978	2021	P43405	CHEMBL2599
CHEMBL559612	2021	P21554	CHEMBL218
CHEMBL4878220	2021	P10721	CHEMBL1936
CHEMBL20	2021	P43166	CHEMBL2326
CHEMBL3335794	2021	P00338	CHEMBL4835
CHEMBL1255588	2021	P21728	CHEMBL2056
CHEMBL4870870	2021	O75762	CHEMBL6007
CHEMBL240773	2021	P14416	CHEMBL217
CHEMBL4795739	2021	P34972	CHEMBL253
CHEMBL4849823	2021	P07900	CHEMBL3880
CHEMBL4594419	2021	P51681	CHEMBL274
CHEMBL750	2021	O43570	CHEMBL3242
CHEMBL4782814	2021	P23458	CHEMBL2835
CHEMBL20	2021	Q16790	CHEMBL3594
CHEMBL99	2021	Q9UBN7	CHEMBL1865
CHEMBL20	2021	O43570	CHEMBL3242
CHEMBL4869361	2021	P45452	CHEMBL280
CHEMBL3963659	2021	P42336	CHEMBL4005
CHEMBL1289601	2021	P35916	CHEMBL1955
CHEMBL4876937	2021	Q14432	CHEMBL241
CHEMBL1951415	2021	P49674	CHEMBL4937
CHEMBL428647	2021	Q13509	CHEMBL2597
CHEMBL1422	2021	P27487	CHEMBL284
CHEMBL477772	2021	Q16790	CHEMBL3594
CHEMBL4856793	2021	P00918	CHEMBL205
CHEMBL4853681	2021	P29274	CHEMBL251
CHEMBL220492	2021	P00918	CHEMBL205
CHEMBL6966	2021	P08183	CHEMBL4302
CHEMBL75	2021	P08684	CHEMBL340
CHEMBL3989958	2021	O75874	CHEMBL2007625
CHEMBL3813873	2021	P07333	CHEMBL1844
CHEMBL636	2021	P06276	CHEMBL1914
CHEMBL4792737	2021	Q8NEB9	CHEMBL1075165
CHEMBL3586404	2021	P42345	CHEMBL2842
CHEMBL388978	2021	P22607	CHEMBL2742
CHEMBL20	2021	Q8N1Q1	CHEMBL3912
CHEMBL4845677	2021	P08581	CHEMBL3717
CHEMBL1201203	2021	P20309	CHEMBL245
CHEMBL38434	2021	Q02127	CHEMBL1966
CHEMBL4872788	2021	P01116	CHEMBL2189121
CHEMBL4798434	2021	O60674	CHEMBL2971
CHEMBL5080679	2021	P30542	CHEMBL226
CHEMBL4782900	2021	P00533	CHEMBL203
CHEMBL4856425	2021	P30556	CHEMBL227
CHEMBL5086559	2021	P09874	CHEMBL3105
CHEMBL38508	2021	Q03181	CHEMBL3979
CHEMBL366208	2021	Q99500	CHEMBL3892
CHEMBL99	2021	O15379	CHEMBL1829
CHEMBL4779775	2021	P34972	CHEMBL253
CHEMBL383921	2021	P23975	CHEMBL222
CHEMBL5082666	2021	P21554	CHEMBL218
CHEMBL4447913	2021	Q16790	CHEMBL3594
CHEMBL3604205	2021	P09619	CHEMBL1913
CHEMBL220492	2021	Q16790	CHEMBL3594
CHEMBL636	2021	P22303	CHEMBL220
CHEMBL1201203	2021	P08172	CHEMBL211
CHEMBL4087767	2021	O75762	CHEMBL6007
CHEMBL4796268	2021	P17752	CHEMBL5689
CHEMBL5075343	2021	Q9HC29	CHEMBL1293266
CHEMBL24828	2021	P35968	CHEMBL279
CHEMBL4864009	2021	P03372	CHEMBL206
CHEMBL20	2021	P22748	CHEMBL3729
CHEMBL4856727	2021	P35354	CHEMBL230
CHEMBL4779753	2021	P36544	CHEMBL2492
CHEMBL4862940	2021	Q9GZT9	CHEMBL5697
CHEMBL4787472	2021	Q96EB6	CHEMBL4506
CHEMBL4848035	2021	Q96PN6	CHEMBL5854
CHEMBL3701715	2021	P56817	CHEMBL4822
CHEMBL4783926	2021	P22607	CHEMBL2742
CHEMBL4874276	2021	P31645	CHEMBL228
CHEMBL4877549	2021	Q07343	CHEMBL275
CHEMBL4551121	2021	P01116	CHEMBL2189121
CHEMBL4861646	2021	P16234	CHEMBL2007
CHEMBL1553629	2021	P21554	CHEMBL218
CHEMBL20	2021	P00915	CHEMBL261
CHEMBL750	2021	P00915	CHEMBL261
CHEMBL4062218	2021	P08684	CHEMBL340
CHEMBL4748465	2021	P08581	CHEMBL3717
CHEMBL716	2021	P14416	CHEMBL217
CHEMBL2094383	2021	Q12809	CHEMBL240
CHEMBL99	2021	Q9BY41	CHEMBL3192
CHEMBL210832	2021	P13569	CHEMBL4051
CHEMBL5083565	2021	P25103	CHEMBL249
CHEMBL5086197	2021	P30542	CHEMBL226
CHEMBL4797035	2021	P23219	CHEMBL221
CHEMBL4799862	2021	Q9NRA0	CHEMBL3023
CHEMBL4761627	2021	P41145	CHEMBL237
CHEMBL4068596	2021	P07900	CHEMBL3880
CHEMBL4857001	2021	P42336	CHEMBL4005
CHEMBL4073496	2021	P10415	CHEMBL4860
CHEMBL4752345	2021	Q9Y5N1	CHEMBL264
CHEMBL3813873	2021	Q96GD4	CHEMBL2185
CHEMBL4869338	2021	O60674	CHEMBL2971
CHEMBL1094770	2021	Q7Z2W7	CHEMBL1075319
CHEMBL4853497	2021	Q92731	CHEMBL242
CHEMBL2071342	2021	P48736	CHEMBL3267
CHEMBL4858552	2021	P11511	CHEMBL1978
CHEMBL1034	2021	P35354	CHEMBL230
CHEMBL24828	2021	P00533	CHEMBL203
CHEMBL4739976	2021	P08684	CHEMBL340
CHEMBL4875508	2021	Q12809	CHEMBL240
CHEMBL4745019	2021	Q99720	CHEMBL287
CHEMBL4869361	2021	P09238	CHEMBL4270
CHEMBL4851555	2021	P00533	CHEMBL203
CHEMBL4869437	2021	Q12809	CHEMBL240
CHEMBL4871799	2021	P08684	CHEMBL340
CHEMBL4783092	2021	P27338	CHEMBL2039
CHEMBL4753501	2021	P27338	CHEMBL2039
CHEMBL132623	2021	Q02127	CHEMBL1966
CHEMBL4781152	2021	Q07869	CHEMBL239
CHEMBL115097	2021	P19793	CHEMBL2061
CHEMBL160	2021	P33527	CHEMBL3004
CHEMBL4779172	2021	O43451	CHEMBL2074
CHEMBL4871998	2021	P42345	CHEMBL2842
CHEMBL4786113	2021	P30530	CHEMBL4895
CHEMBL4798482	2021	P35869	CHEMBL3201
CHEMBL4756352	2021	Q12809	CHEMBL240
CHEMBL4745475	2021	P00374	CHEMBL202
CHEMBL2364639	2021	Q12809	CHEMBL240
CHEMBL5090848	2021	O60603	CHEMBL4163
CHEMBL4879236	2021	Q99814	CHEMBL1744522
CHEMBL4857228	2021	P33527	CHEMBL3004
CHEMBL4779944	2021	Q12809	CHEMBL240
CHEMBL4854861	2021	P07900	CHEMBL3880
CHEMBL4848125	2021	P08183	CHEMBL4302
CHEMBL4876457	2021	P25103	CHEMBL249
CHEMBL4745982	2021	P41594	CHEMBL3227
CHEMBL4858546	2021	P06276	CHEMBL1914
CHEMBL4869634	2021	P15056	CHEMBL5145
CHEMBL4632578	2021	Q8IXJ6	CHEMBL4462
CHEMBL1201182	2021	P42345	CHEMBL2842
CHEMBL4853497	2021	P03372	CHEMBL206
CHEMBL4852987	2021	P41145	CHEMBL237
CHEMBL25	2021	P35354	CHEMBL230
CHEMBL4762789	2021	Q07343	CHEMBL275
CHEMBL4874833	2021	O00206	CHEMBL5255
CHEMBL2365642	2021	P56817	CHEMBL4822
CHEMBL4853466	2021	P41143	CHEMBL236
CHEMBL4862882	2021	O00206	CHEMBL5255
CHEMBL164	2021	P56817	CHEMBL4822
CHEMBL4787162	2021	Q9Y233	CHEMBL4409
CHEMBL290106	2021	P02766	CHEMBL3194
CHEMBL4871166	2021	P28062	CHEMBL5620
CHEMBL4213248	2021	Q12809	CHEMBL240
CHEMBL2071342	2021	P42336	CHEMBL4005
CHEMBL4863993	2021	O75762	CHEMBL6007
CHEMBL449216	2021	Q06187	CHEMBL5251
CHEMBL412119	2021	P36544	CHEMBL2492
CHEMBL4851806	2021	Q9UM73	CHEMBL4247
CHEMBL508955	2021	P35372	CHEMBL233
CHEMBL4871524	2021	P08684	CHEMBL340
CHEMBL5085731	2021	P13569	CHEMBL4051
CHEMBL4757857	2021	P51681	CHEMBL274
CHEMBL4763130	2021	P27338	CHEMBL2039
CHEMBL4783024	2021	P10828	CHEMBL1947
CHEMBL1208974	2021	O43451	CHEMBL2074
CHEMBL5080191	2021	Q06187	CHEMBL5251
CHEMBL465718	2021	P00338	CHEMBL4835
CHEMBL28079	2021	O76074	CHEMBL1827
CHEMBL898	2021	P02766	CHEMBL3194
CHEMBL3764617	2021	Q9NRA0	CHEMBL3023
CHEMBL4873225	2021	P08254	CHEMBL283
CHEMBL4741456	2021	P22894	CHEMBL4588
CHEMBL4849565	2021	P28062	CHEMBL5620
CHEMBL4789468	2021	P11387	CHEMBL1781
CHEMBL4849361	2021	P22303	CHEMBL220
CHEMBL4750370	2021	P42336	CHEMBL4005
CHEMBL444060	2021	P30556	CHEMBL227
CHEMBL5085936	2021	O00329	CHEMBL3130
CHEMBL4796666	2021	Q96RI1	CHEMBL2047
CHEMBL4877359	2021	Q12809	CHEMBL240
CHEMBL275661	2021	Q96SW2	CHEMBL3763008
CHEMBL4879150	2021	Q12809	CHEMBL240
CHEMBL422704	2021	P00338	CHEMBL4835
CHEMBL596112	2021	P22303	CHEMBL220
CHEMBL4783619	2021	Q12809	CHEMBL240
CHEMBL568708	2021	P28062	CHEMBL5620
CHEMBL1784801	2021	P11511	CHEMBL1978
CHEMBL4858322	2021	P28062	CHEMBL5620
CHEMBL4867297	2021	Q12809	CHEMBL240
CHEMBL4848125	2021	P33527	CHEMBL3004
CHEMBL2017291	2021	P08684	CHEMBL340
CHEMBL5075013	2022	Q02127	CHEMBL1966
CHEMBL5087917	2022	Q15910	CHEMBL2189110
CHEMBL5083403	2022	P35372	CHEMBL233
CHEMBL1421	2022	P07333	CHEMBL1844
CHEMBL5080996	2022	P42345	CHEMBL2842
CHEMBL4449557	2022	P33981	CHEMBL3983
CHEMBL5077828	2022	Q9NR97	CHEMBL5805
CHEMBL5088217	2022	Q15910	CHEMBL2189110
CHEMBL5077126	2022	P23458	CHEMBL2835
CHEMBL5085176	2022	P52333	CHEMBL2148
CHEMBL7257	2022	P28223	CHEMBL224
CHEMBL5087255	2022	P23458	CHEMBL2835
CHEMBL5093798	2022	Q13547	CHEMBL325
CHEMBL5075594	2022	Q06187	CHEMBL5251
CHEMBL5082406	2022	P56817	CHEMBL4822
CHEMBL5079497	2022	P04049	CHEMBL1906
CHEMBL5076283	2022	Q06187	CHEMBL5251
CHEMBL5085412	2022	P56817	CHEMBL4822
CHEMBL1789941	2022	O60674	CHEMBL2971
CHEMBL244488	2022	Q02750	CHEMBL3587
CHEMBL5094579	2022	P42345	CHEMBL2842
CHEMBL5086902	2022	P41143	CHEMBL236
CHEMBL5093937	2022	P35372	CHEMBL233
CHEMBL5092781	2022	O60674	CHEMBL2971
CHEMBL5092394	2022	P21554	CHEMBL218
CHEMBL5086431	2022	P36888	CHEMBL1974
CHEMBL5092606	2022	P36888	CHEMBL1974
CHEMBL5084340	2022	P52333	CHEMBL2148
CHEMBL5074310	2022	O60674	CHEMBL2971
CHEMBL5094089	2022	P23458	CHEMBL2835
CHEMBL5087786	2022	Q16790	CHEMBL3594
CHEMBL5083572	2022	P41143	CHEMBL236
CHEMBL5092606	2022	P36888	CHEMBL1974
CHEMBL2443262	2022	P35372	CHEMBL233
CHEMBL5088717	2022	P36888	CHEMBL1974
CHEMBL5091113	2022	Q9NYK1	CHEMBL5936
CHEMBL5069857	2022	P22455	CHEMBL3973
CHEMBL5085515	2022	P42345	CHEMBL2842
CHEMBL5086413	2022	P42345	CHEMBL2842
CHEMBL3937015	2022	P30542	CHEMBL226
CHEMBL5091527	2022	Q15910	CHEMBL2189110
CHEMBL2140523	2022	P33981	CHEMBL3983
CHEMBL5087654	2022	O00329	CHEMBL3130
CHEMBL5077653	2022	O60674	CHEMBL2971
CHEMBL5087255	2022	O60674	CHEMBL2971
CHEMBL5078909	2022	P35372	CHEMBL233
CHEMBL98	2022	Q13547	CHEMBL325
CHEMBL5088153	2022	P04629	CHEMBL2815
CHEMBL5084704	2022	P30542	CHEMBL226
CHEMBL5080051	2022	P28223	CHEMBL224
CHEMBL5083603	2022	P36888	CHEMBL1974
CHEMBL5084913	2022	O60674	CHEMBL2971
CHEMBL5075715	2022	P36888	CHEMBL1974
CHEMBL5075715	2022	P36888	CHEMBL1974
CHEMBL5074539	2022	Q96SW2	CHEMBL3763008
CHEMBL5075223	2022	O60674	CHEMBL2971
CHEMBL511749	2022	Q9UBN7	CHEMBL1865
CHEMBL4066176	2022	Q06187	CHEMBL5251
CHEMBL5076817	2022	Q06187	CHEMBL5251
CHEMBL5084222	2022	P29274	CHEMBL251
CHEMBL5092968	2022	P30542	CHEMBL226
CHEMBL5083772	2022	Q06187	CHEMBL5251
CHEMBL5087214	2022	Q06187	CHEMBL5251
CHEMBL20	2022	Q16790	CHEMBL3594
CHEMBL5093540	2022	P48736	CHEMBL3267
CHEMBL5078609	2022	P30542	CHEMBL226
CHEMBL4525199	2022	P56817	CHEMBL4822
CHEMBL5082250	2022	P31645	CHEMBL228
CHEMBL5093798	2022	Q9BY41	CHEMBL3192
CHEMBL5089872	2022	P04629	CHEMBL2815
CHEMBL5086893	2022	P29597	CHEMBL3553
CHEMBL5088804	2022	O60674	CHEMBL2971
CHEMBL5087772	2022	Q92769	CHEMBL1937
CHEMBL5076728	2022	O60674	CHEMBL2971
CHEMBL5074137	2022	P30542	CHEMBL226
CHEMBL5073935	2022	O60674	CHEMBL2971
CHEMBL5076598	2022	O60674	CHEMBL2971
CHEMBL5092838	2022	Q9UBN7	CHEMBL1865
CHEMBL5082472	2022	P41143	CHEMBL236
CHEMBL5085723	2022	O43570	CHEMBL3242
CHEMBL5086208	2022	Q92769	CHEMBL1937
CHEMBL5069649	2022	P00918	CHEMBL205
CHEMBL5075114	2022	P08183	CHEMBL4302
CHEMBL5078526	2022	O60674	CHEMBL2971
CHEMBL5089904	2022	P00915	CHEMBL261
CHEMBL5071558	2022	P08908	CHEMBL214
CHEMBL5076733	2022	P21554	CHEMBL218
CHEMBL5086251	2022	P48736	CHEMBL3267
CHEMBL5090428	2022	P04049	CHEMBL1906
CHEMBL5086753	2022	Q16288	CHEMBL5608
CHEMBL5078550	2022	P30542	CHEMBL226
CHEMBL5082360	2022	P31645	CHEMBL228
CHEMBL5089877	2022	P52333	CHEMBL2148
CHEMBL5094029	2022	Q92769	CHEMBL1937
CHEMBL5076643	2022	P30542	CHEMBL226
CHEMBL4209441	2022	Q06187	CHEMBL5251
CHEMBL5094489	2022	P28223	CHEMBL224
CHEMBL5089987	2022	P07333	CHEMBL1844
CHEMBL5075684	2022	P21554	CHEMBL218
CHEMBL5092127	2022	P04629	CHEMBL2815
CHEMBL5087284	2022	P36888	CHEMBL1974
CHEMBL2181976	2022	P29274	CHEMBL251
CHEMBL5087483	2022	P21554	CHEMBL218
CHEMBL5076422	2022	P21554	CHEMBL218
CHEMBL5087941	2022	P21554	CHEMBL218
CHEMBL5079395	2022	Q13547	CHEMBL325
CHEMBL5069979	2022	Q06187	CHEMBL5251
CHEMBL5093072	2022	O43570	CHEMBL3242
CHEMBL5077653	2022	P29597	CHEMBL3553
CHEMBL3621988	2022	Q13547	CHEMBL325
CHEMBL5081105	2022	P29274	CHEMBL251
CHEMBL5085993	2022	Q15910	CHEMBL2189110
CHEMBL5076699	2022	P30542	CHEMBL226
CHEMBL5072425	2022	P29597	CHEMBL3553
CHEMBL4446892	2022	P07333	CHEMBL1844
CHEMBL5085413	2022	P21554	CHEMBL218
CHEMBL5083761	2022	Q13547	CHEMBL325
CHEMBL5073925	2022	O60674	CHEMBL2971
CHEMBL5075214	2022	Q02127	CHEMBL1966
CHEMBL5082643	2022	P21554	CHEMBL218
CHEMBL5079133	2022	P00915	CHEMBL261
CHEMBL5077891	2022	P48736	CHEMBL3267
CHEMBL5077960	2022	Q13547	CHEMBL325
CHEMBL5083767	2022	Q9UBN7	CHEMBL1865
CHEMBL5083738	2022	O43570	CHEMBL3242
CHEMBL5073925	2022	P29597	CHEMBL3553
CHEMBL5089633	2022	P27338	CHEMBL2039
CHEMBL502	2022	Q12809	CHEMBL240
CHEMBL5083157	2022	P00915	CHEMBL261
CHEMBL5069649	2022	P00915	CHEMBL261
CHEMBL5076687	2022	P00915	CHEMBL261
CHEMBL5069541	2022	Q9UBN7	CHEMBL1865
CHEMBL399680	2022	P08684	CHEMBL340
CHEMBL2071605	2022	P05106	CHEMBL1907598
CHEMBL5088750	2022	P30542	CHEMBL226
CHEMBL5089019	2022	P21554	CHEMBL218
CHEMBL5075884	2022	P08684	CHEMBL340
CHEMBL5080125	2022	P10721	CHEMBL1936
CHEMBL5082471	2022	P22748	CHEMBL3729
CHEMBL5075240	2022	P10275	CHEMBL1871
CHEMBL5090504	2022	P21397	CHEMBL1951
CHEMBL5084156	2022	P48736	CHEMBL3267
CHEMBL5085802	2022	P0DMS8	CHEMBL256
CHEMBL5082354	2022	P21397	CHEMBL1951
CHEMBL5087053	2022	Q12809	CHEMBL240
CHEMBL5088757	2022	Q16790	CHEMBL3594
CHEMBL5083458	2022	P18825	CHEMBL1916
CHEMBL5085562	2022	Q12809	CHEMBL240
CHEMBL5070026	2022	Q9UBN7	CHEMBL1865
CHEMBL5070958	2022	P14416	CHEMBL217
