# Supplementary figures and images for: Predicting novel targets with Bayesian machine learning by integrating multiple biological signatures
Source: Royal Society of Chemistry journal article supplement (doi:10.1039/d4sc03580a), 2024-01-01

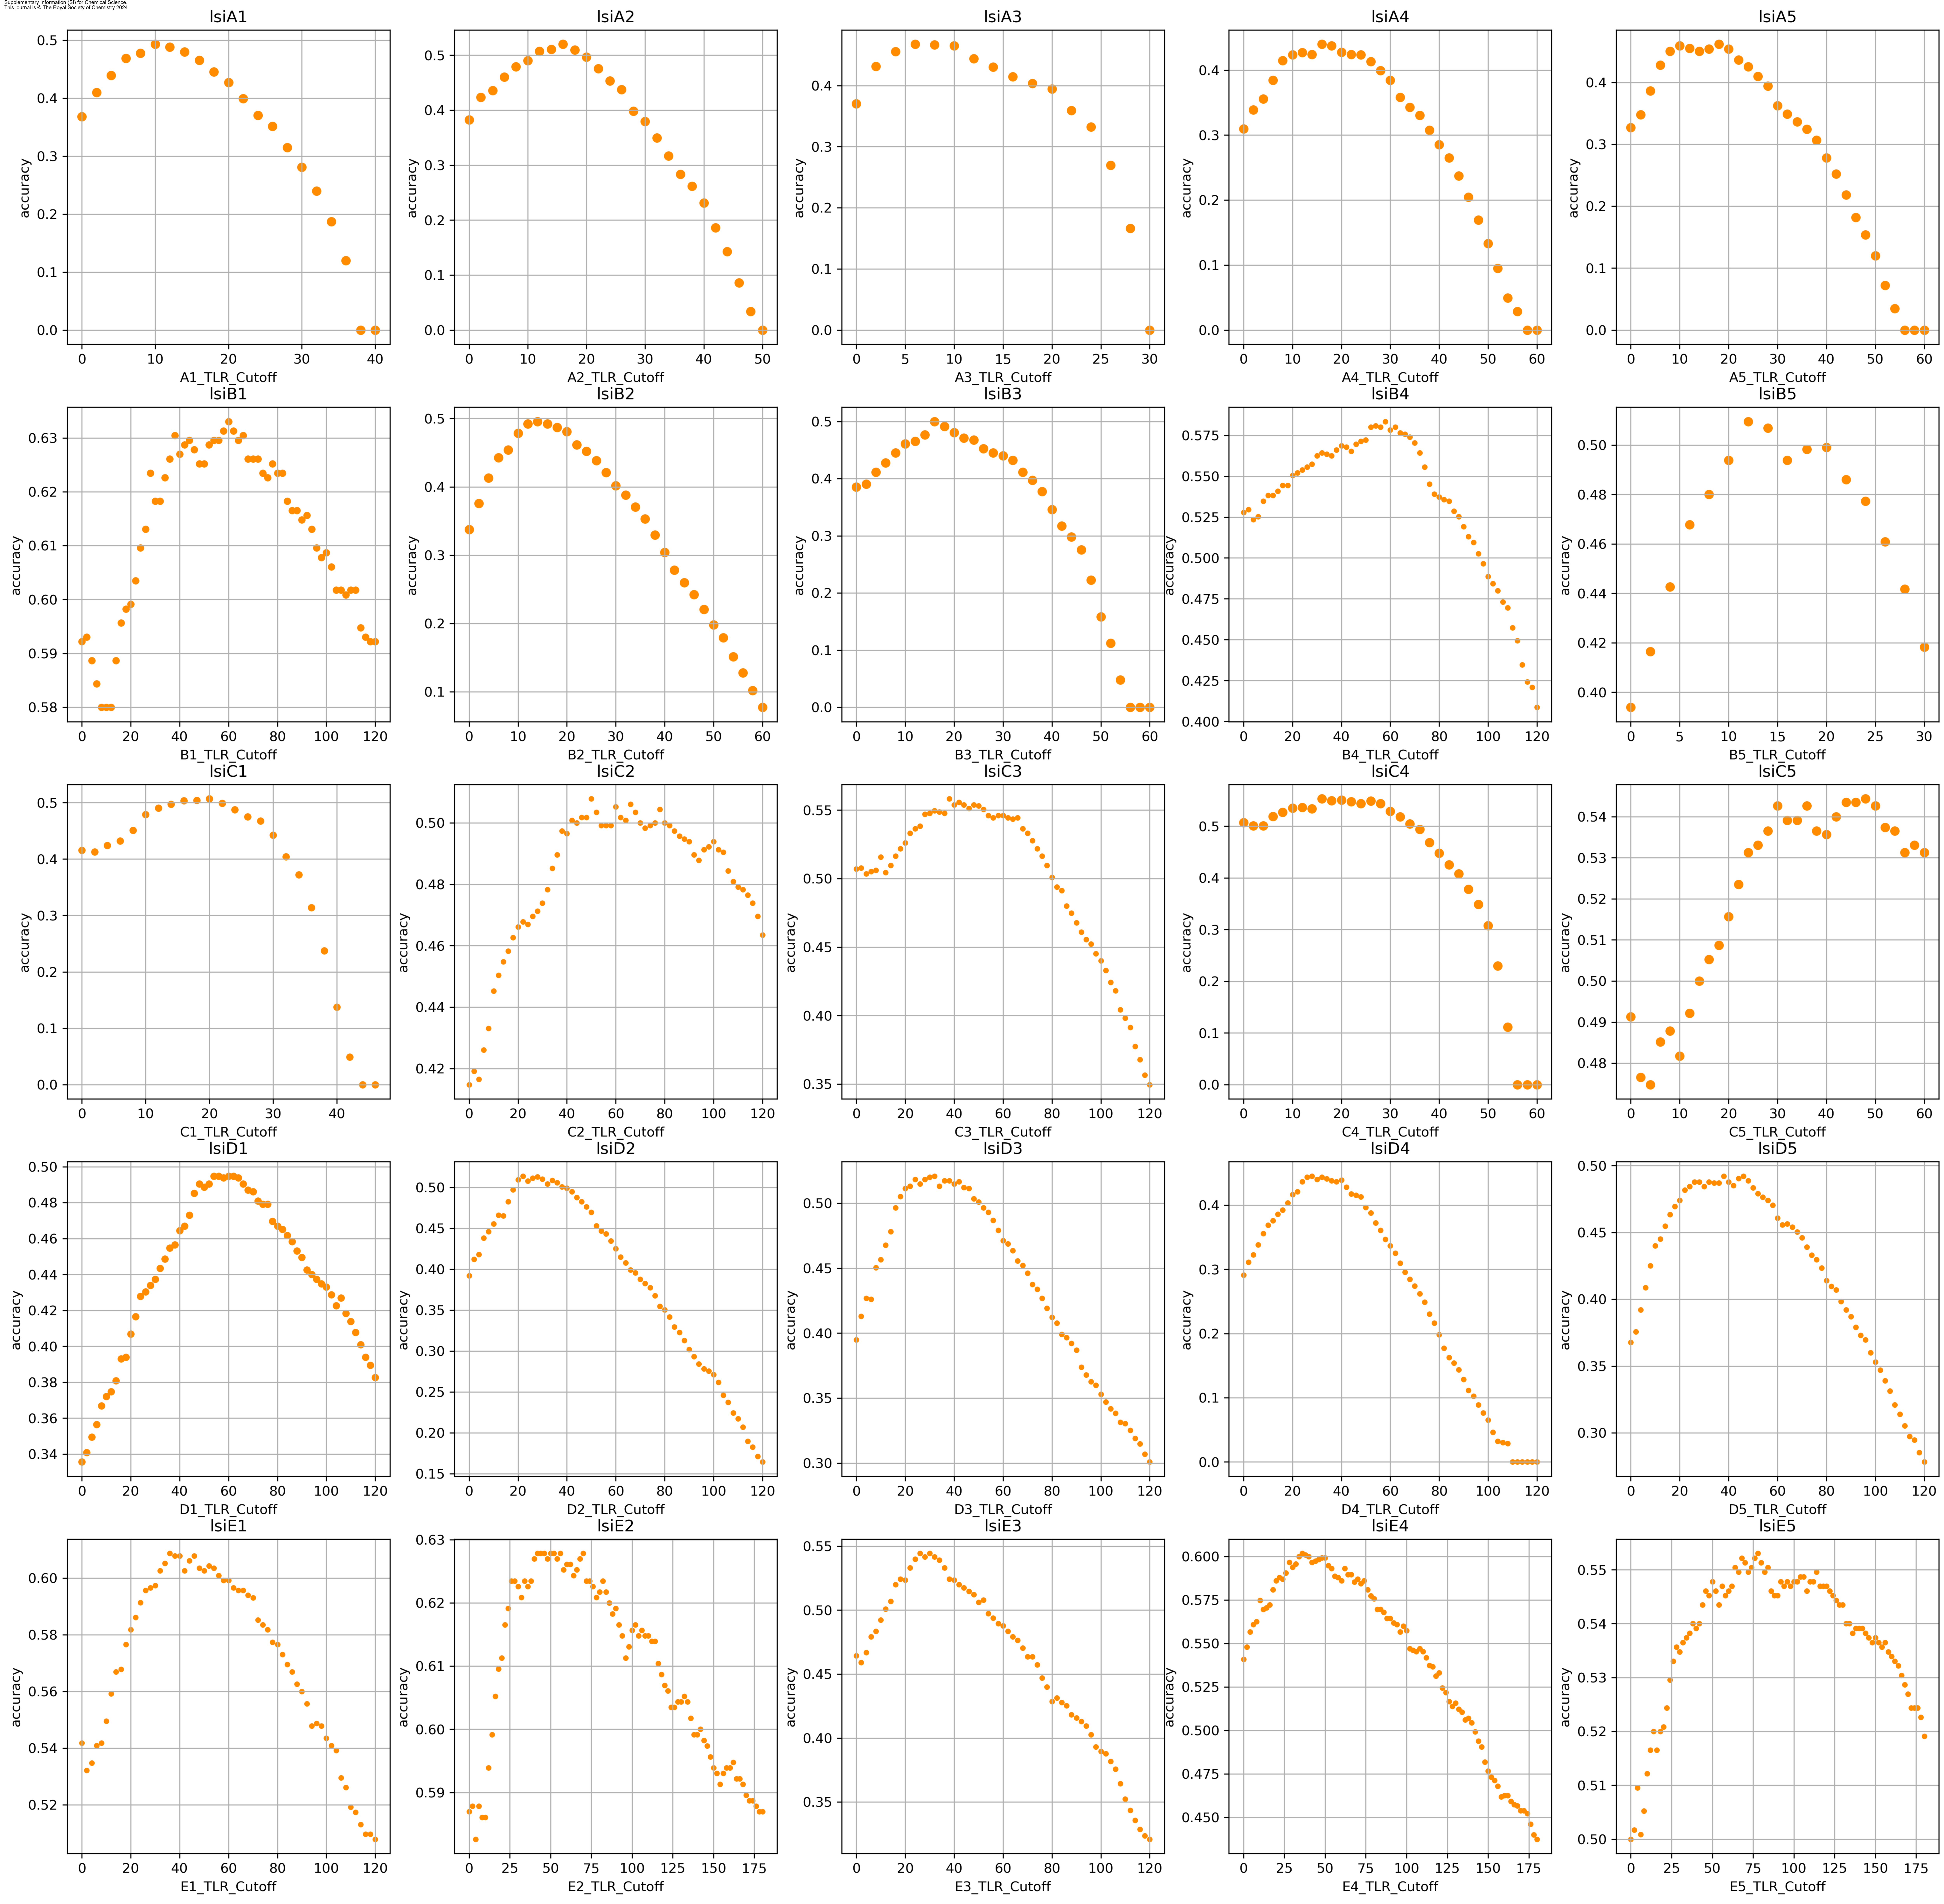

Supplement: d4sc03580a3.pdf [file d4sc03580a3.pdf]

IsiA

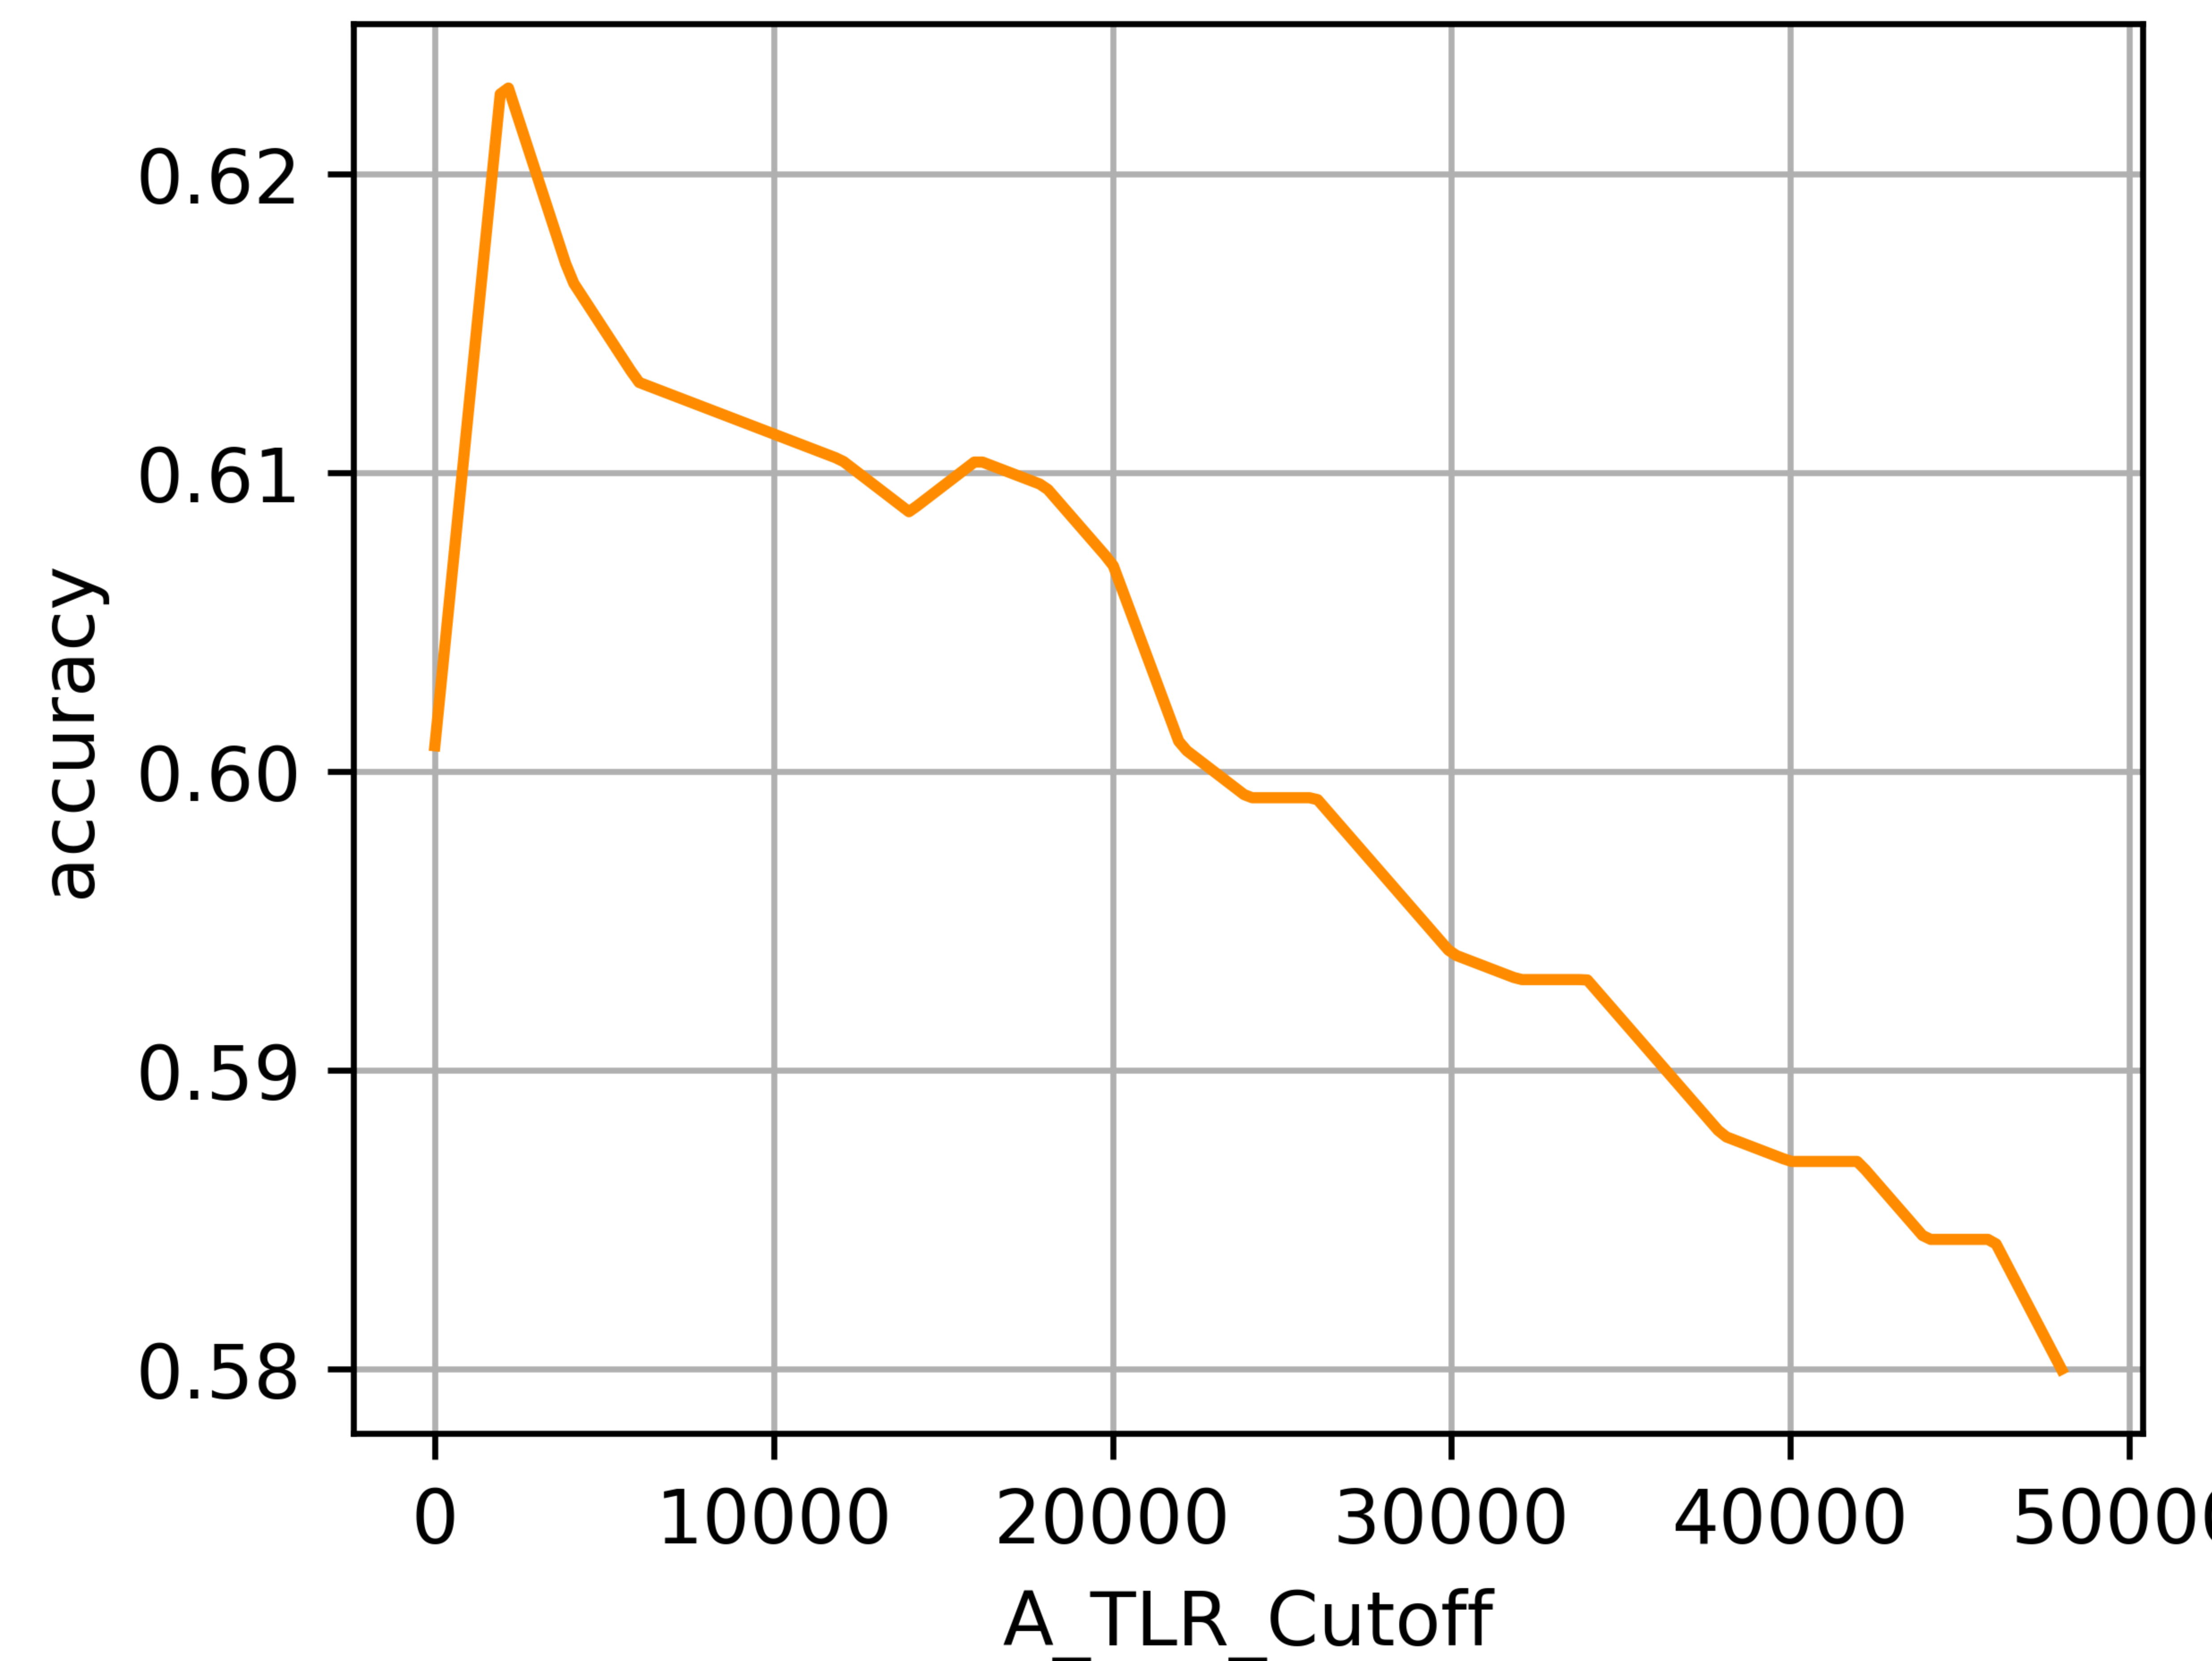

IsiB

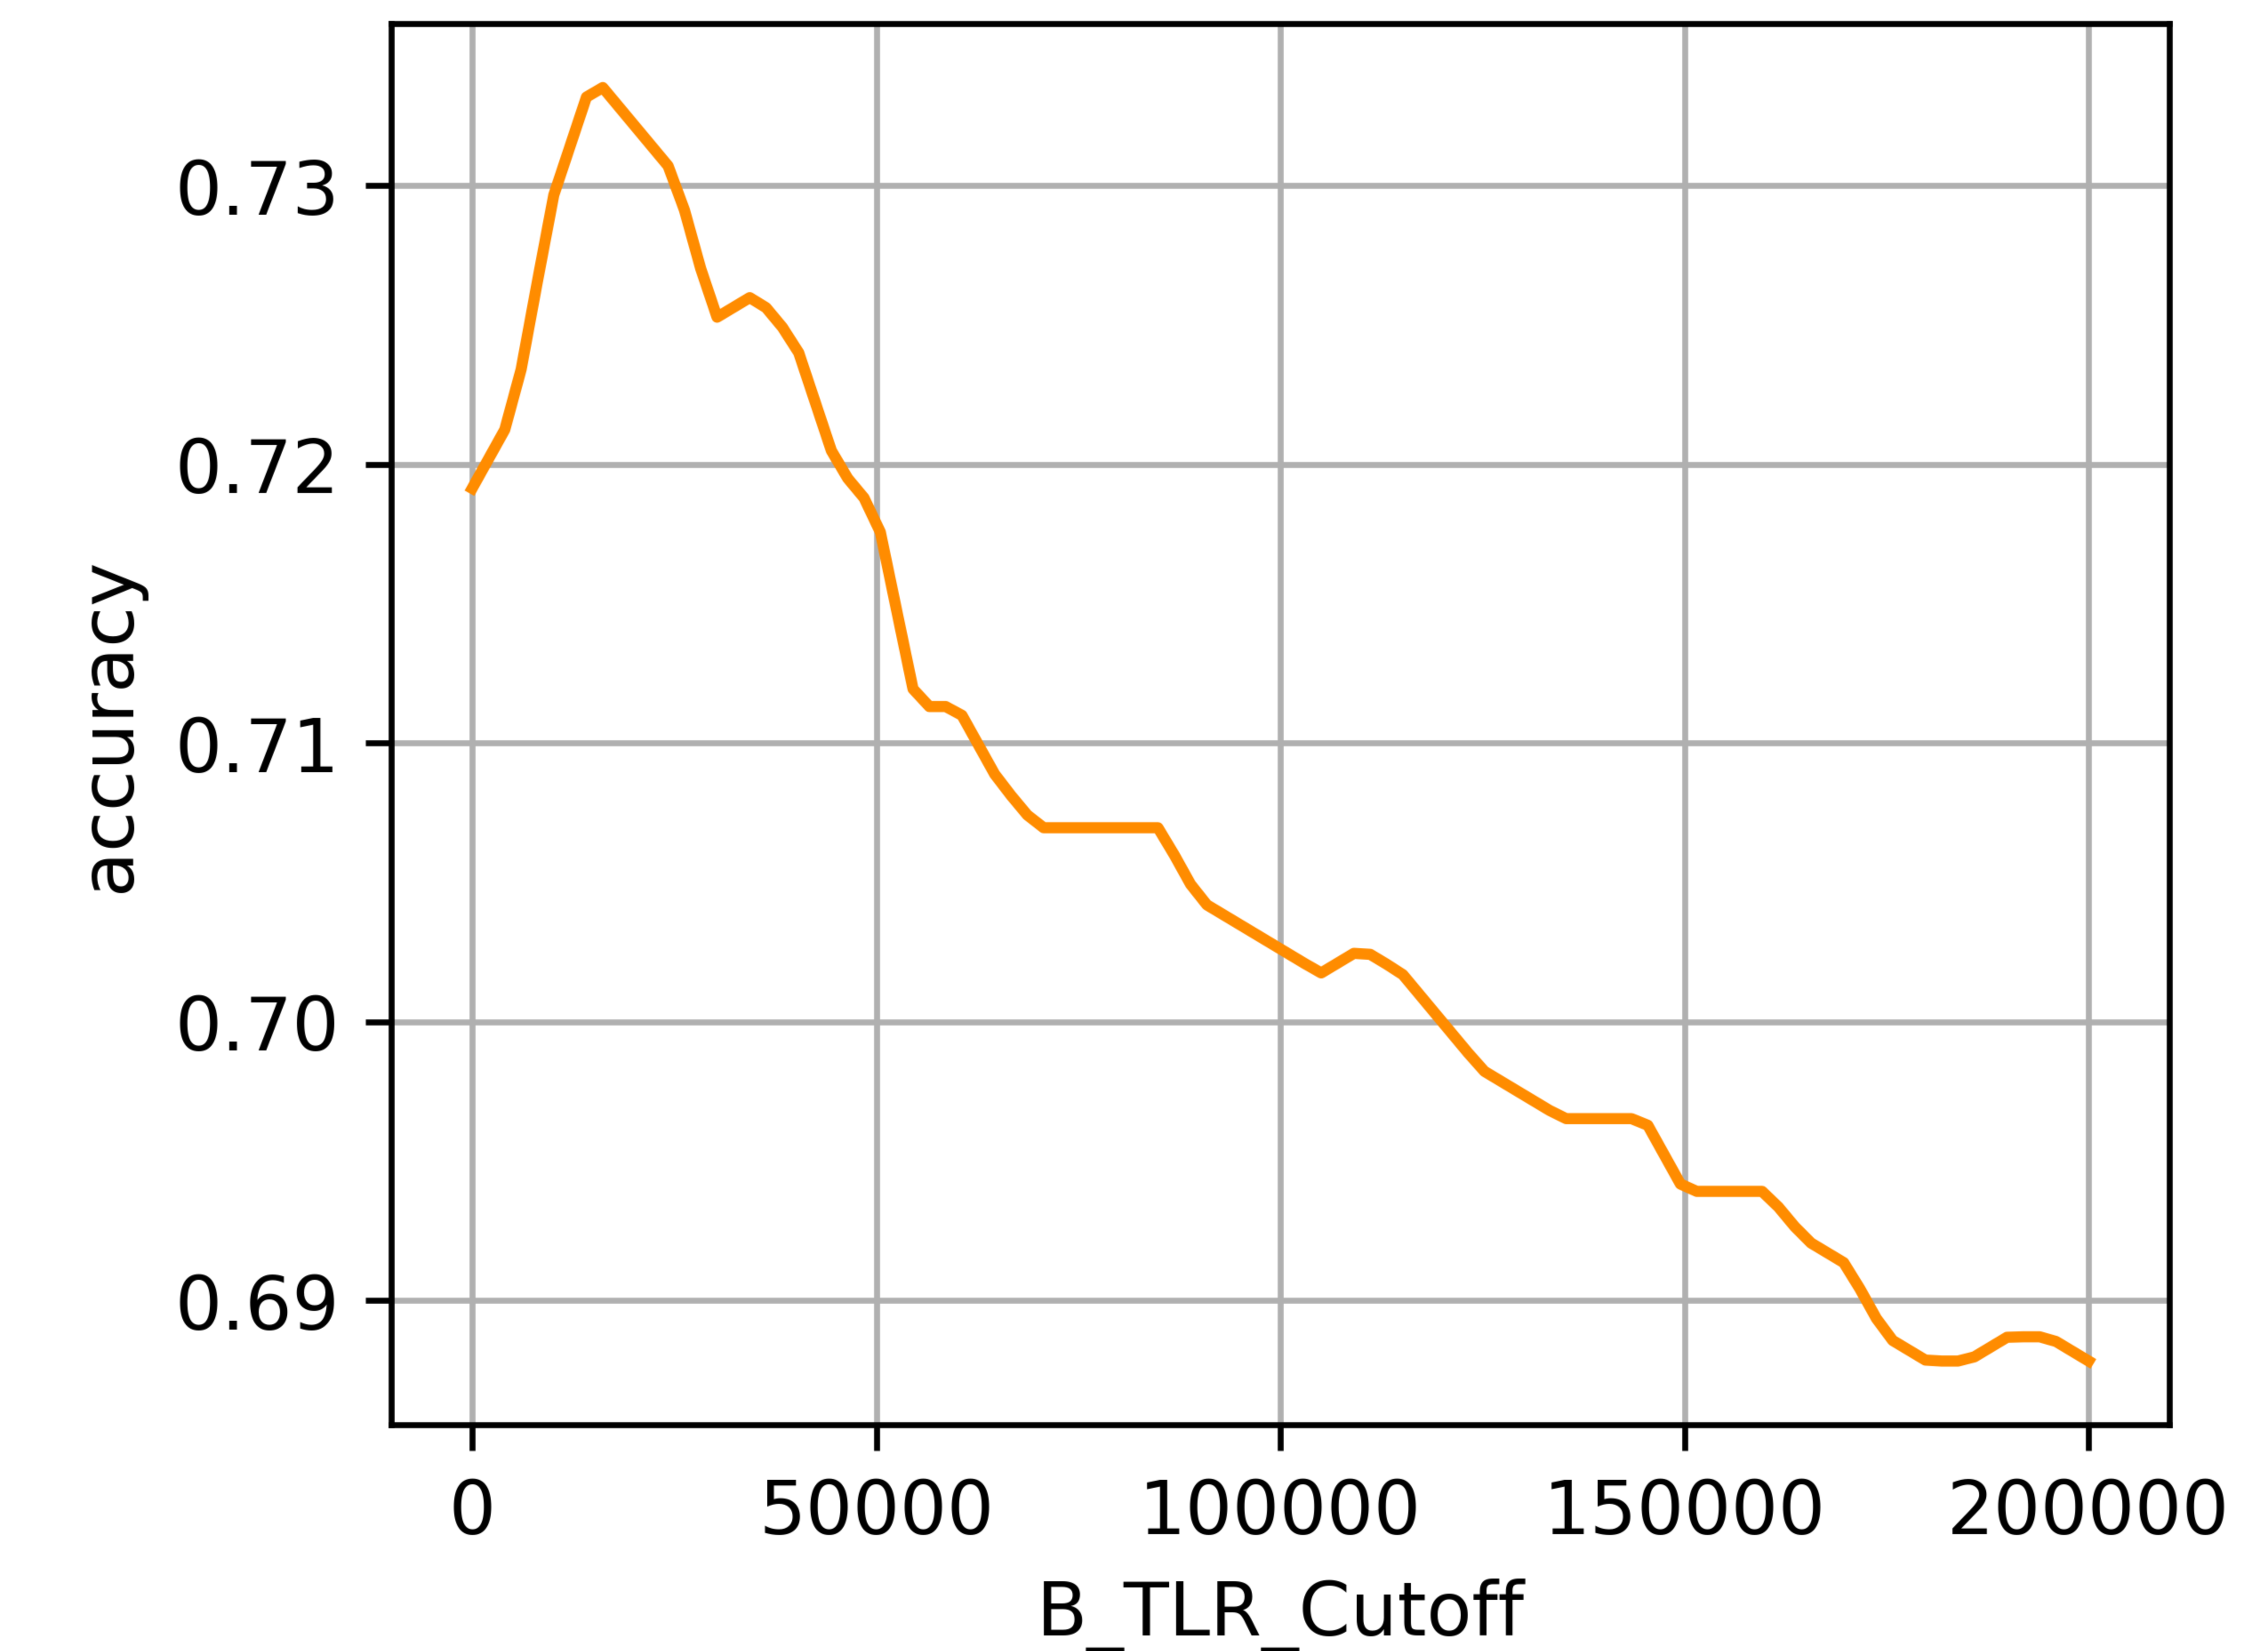

IsiC

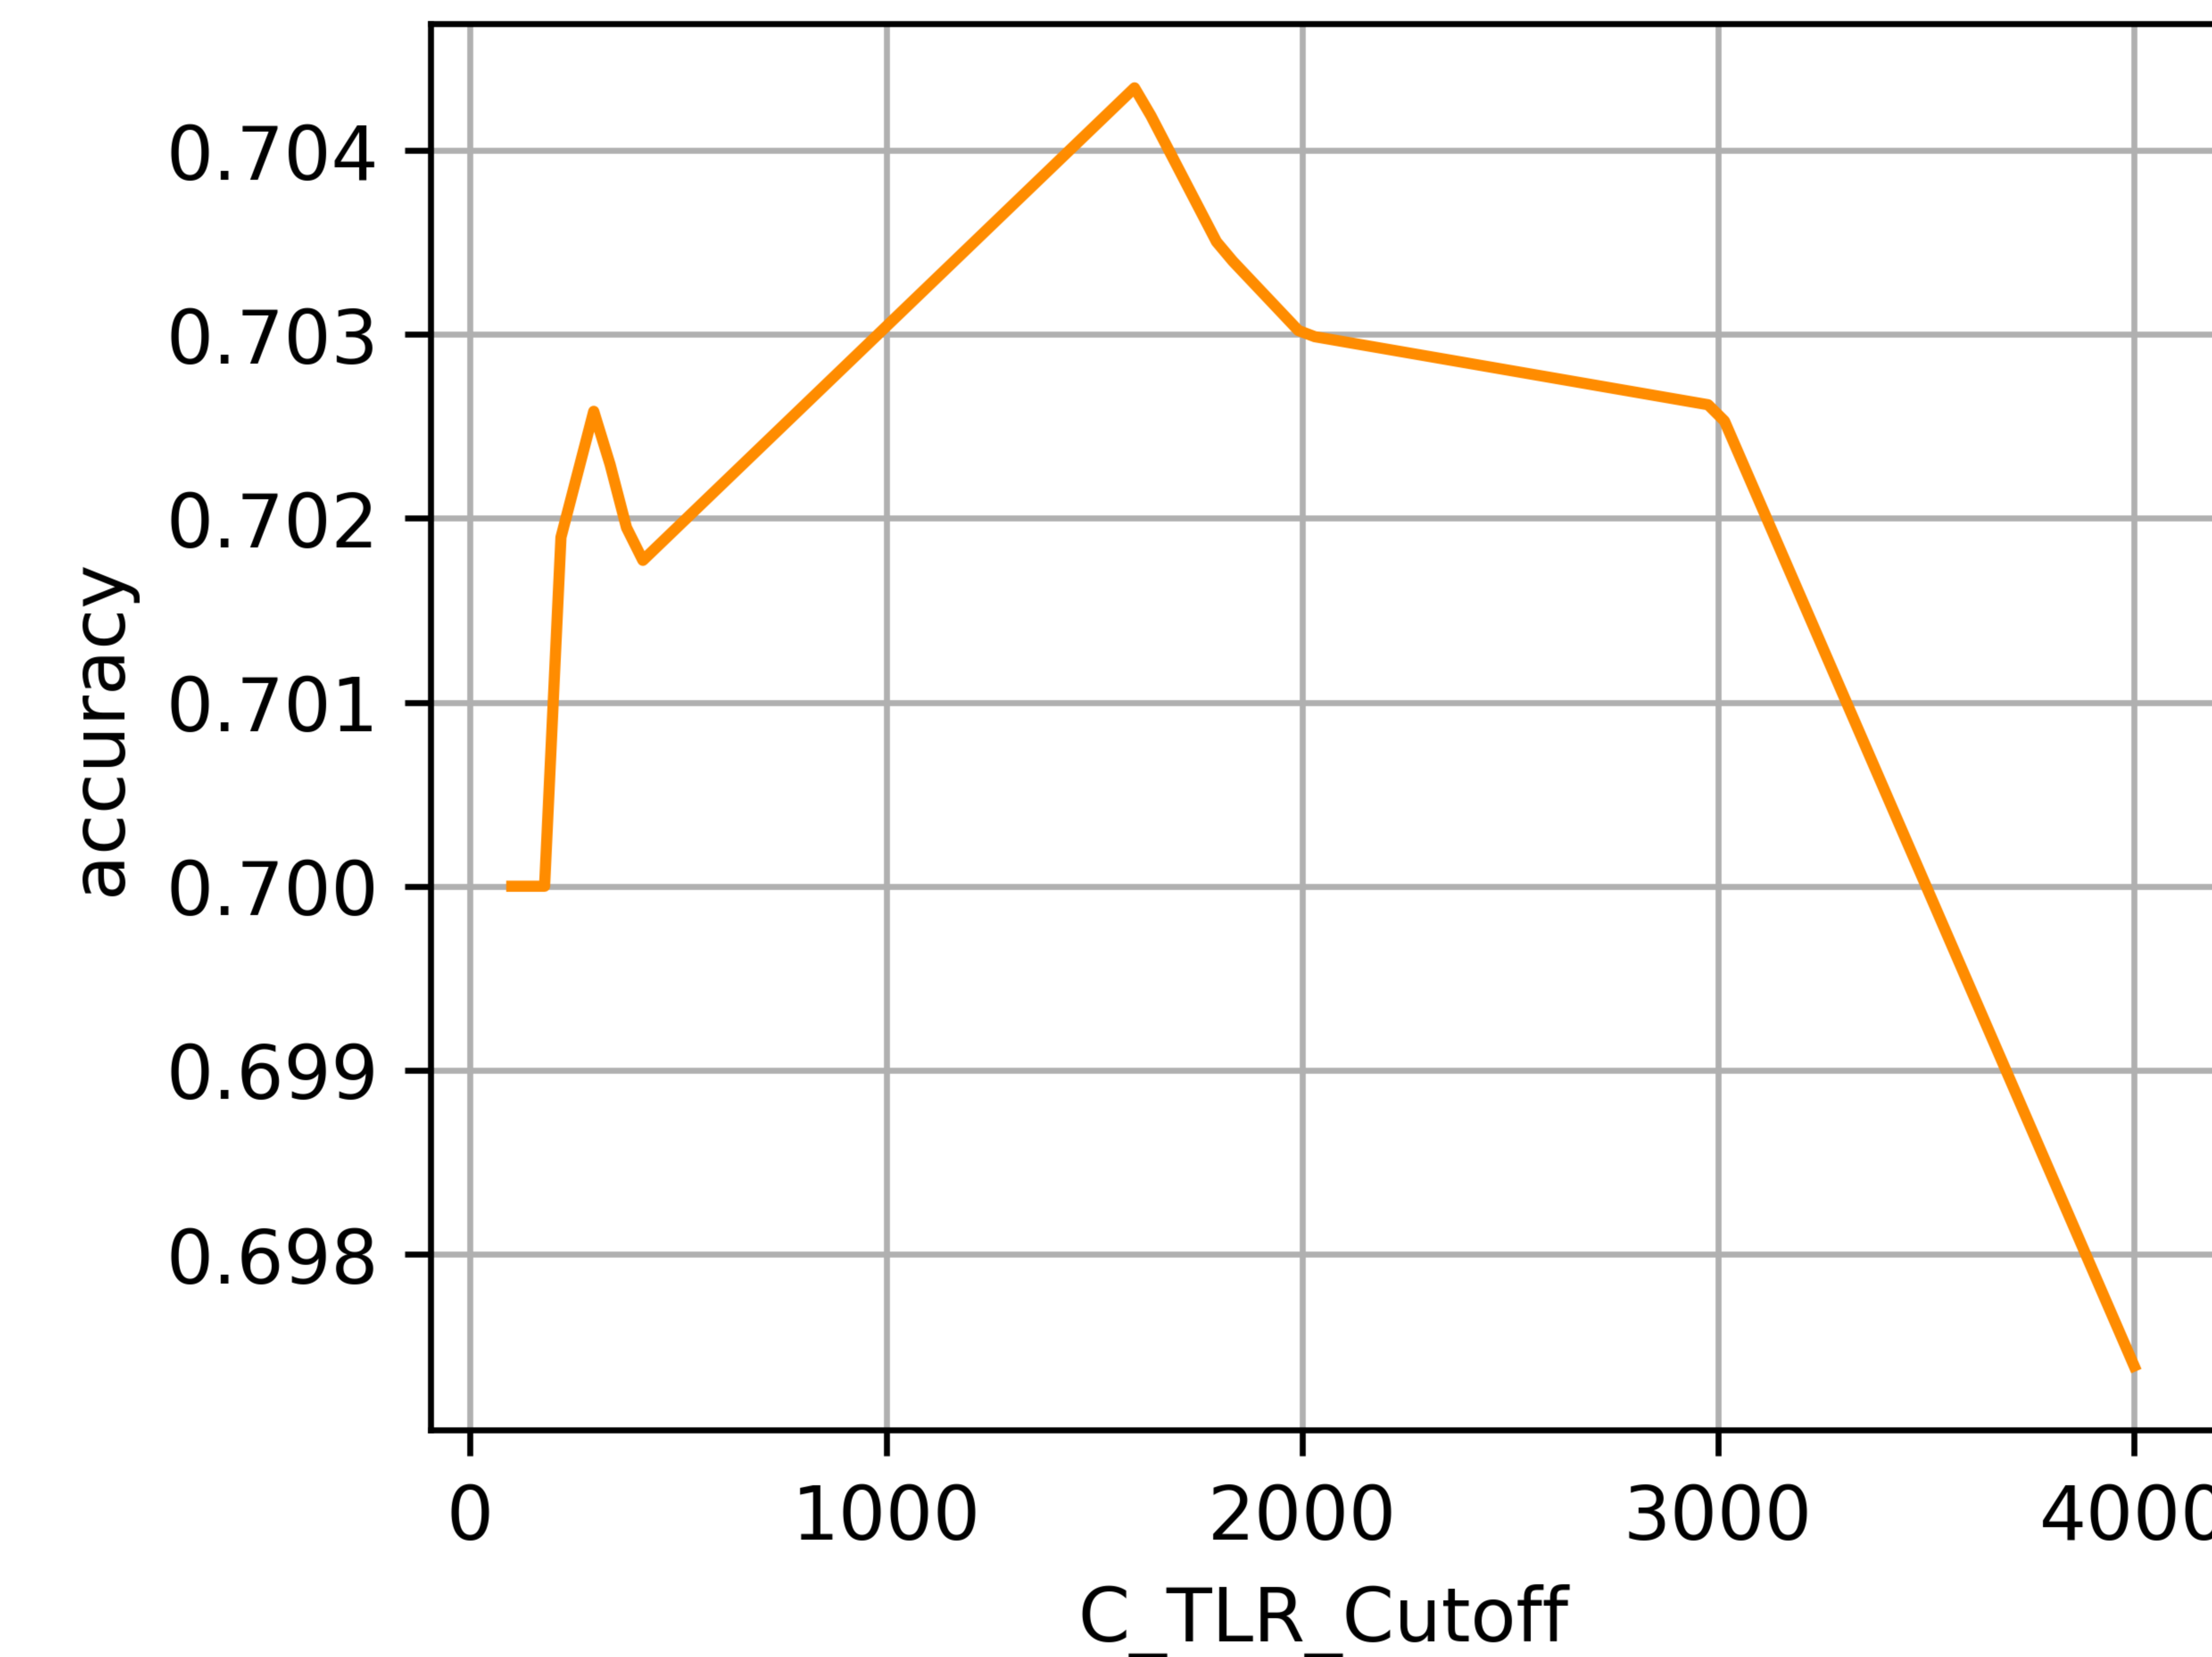

IsiD

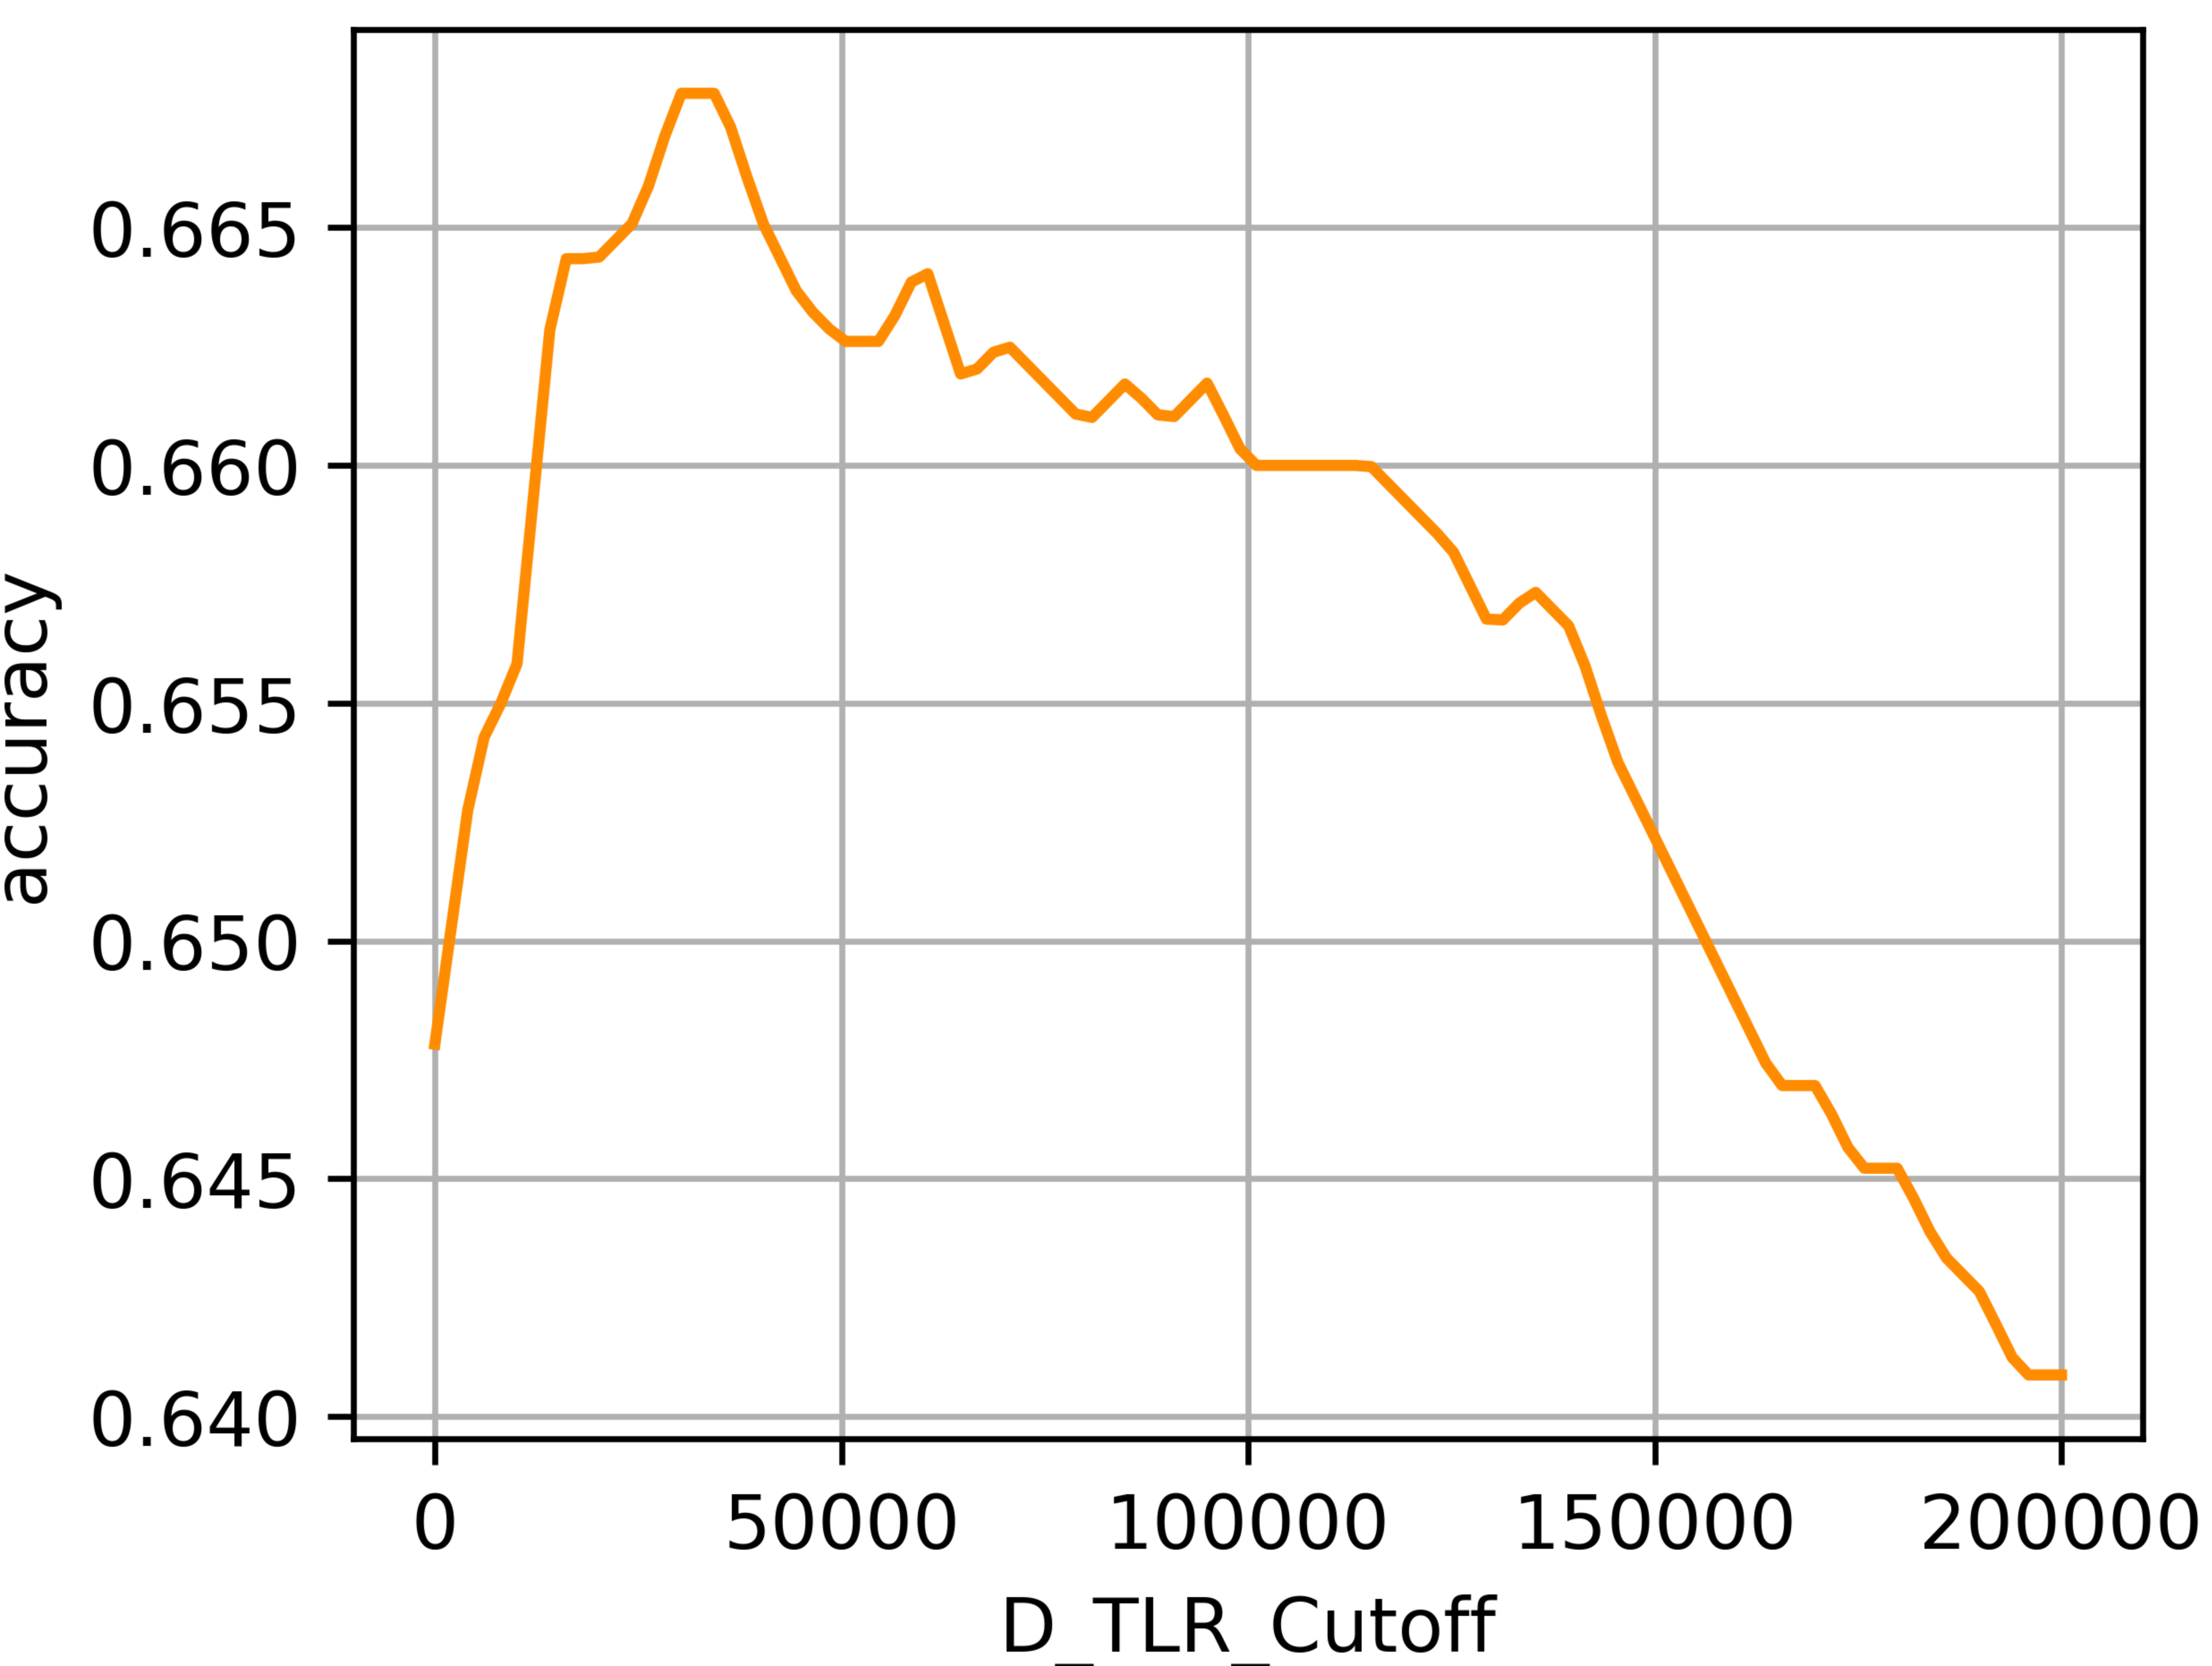

IsiE

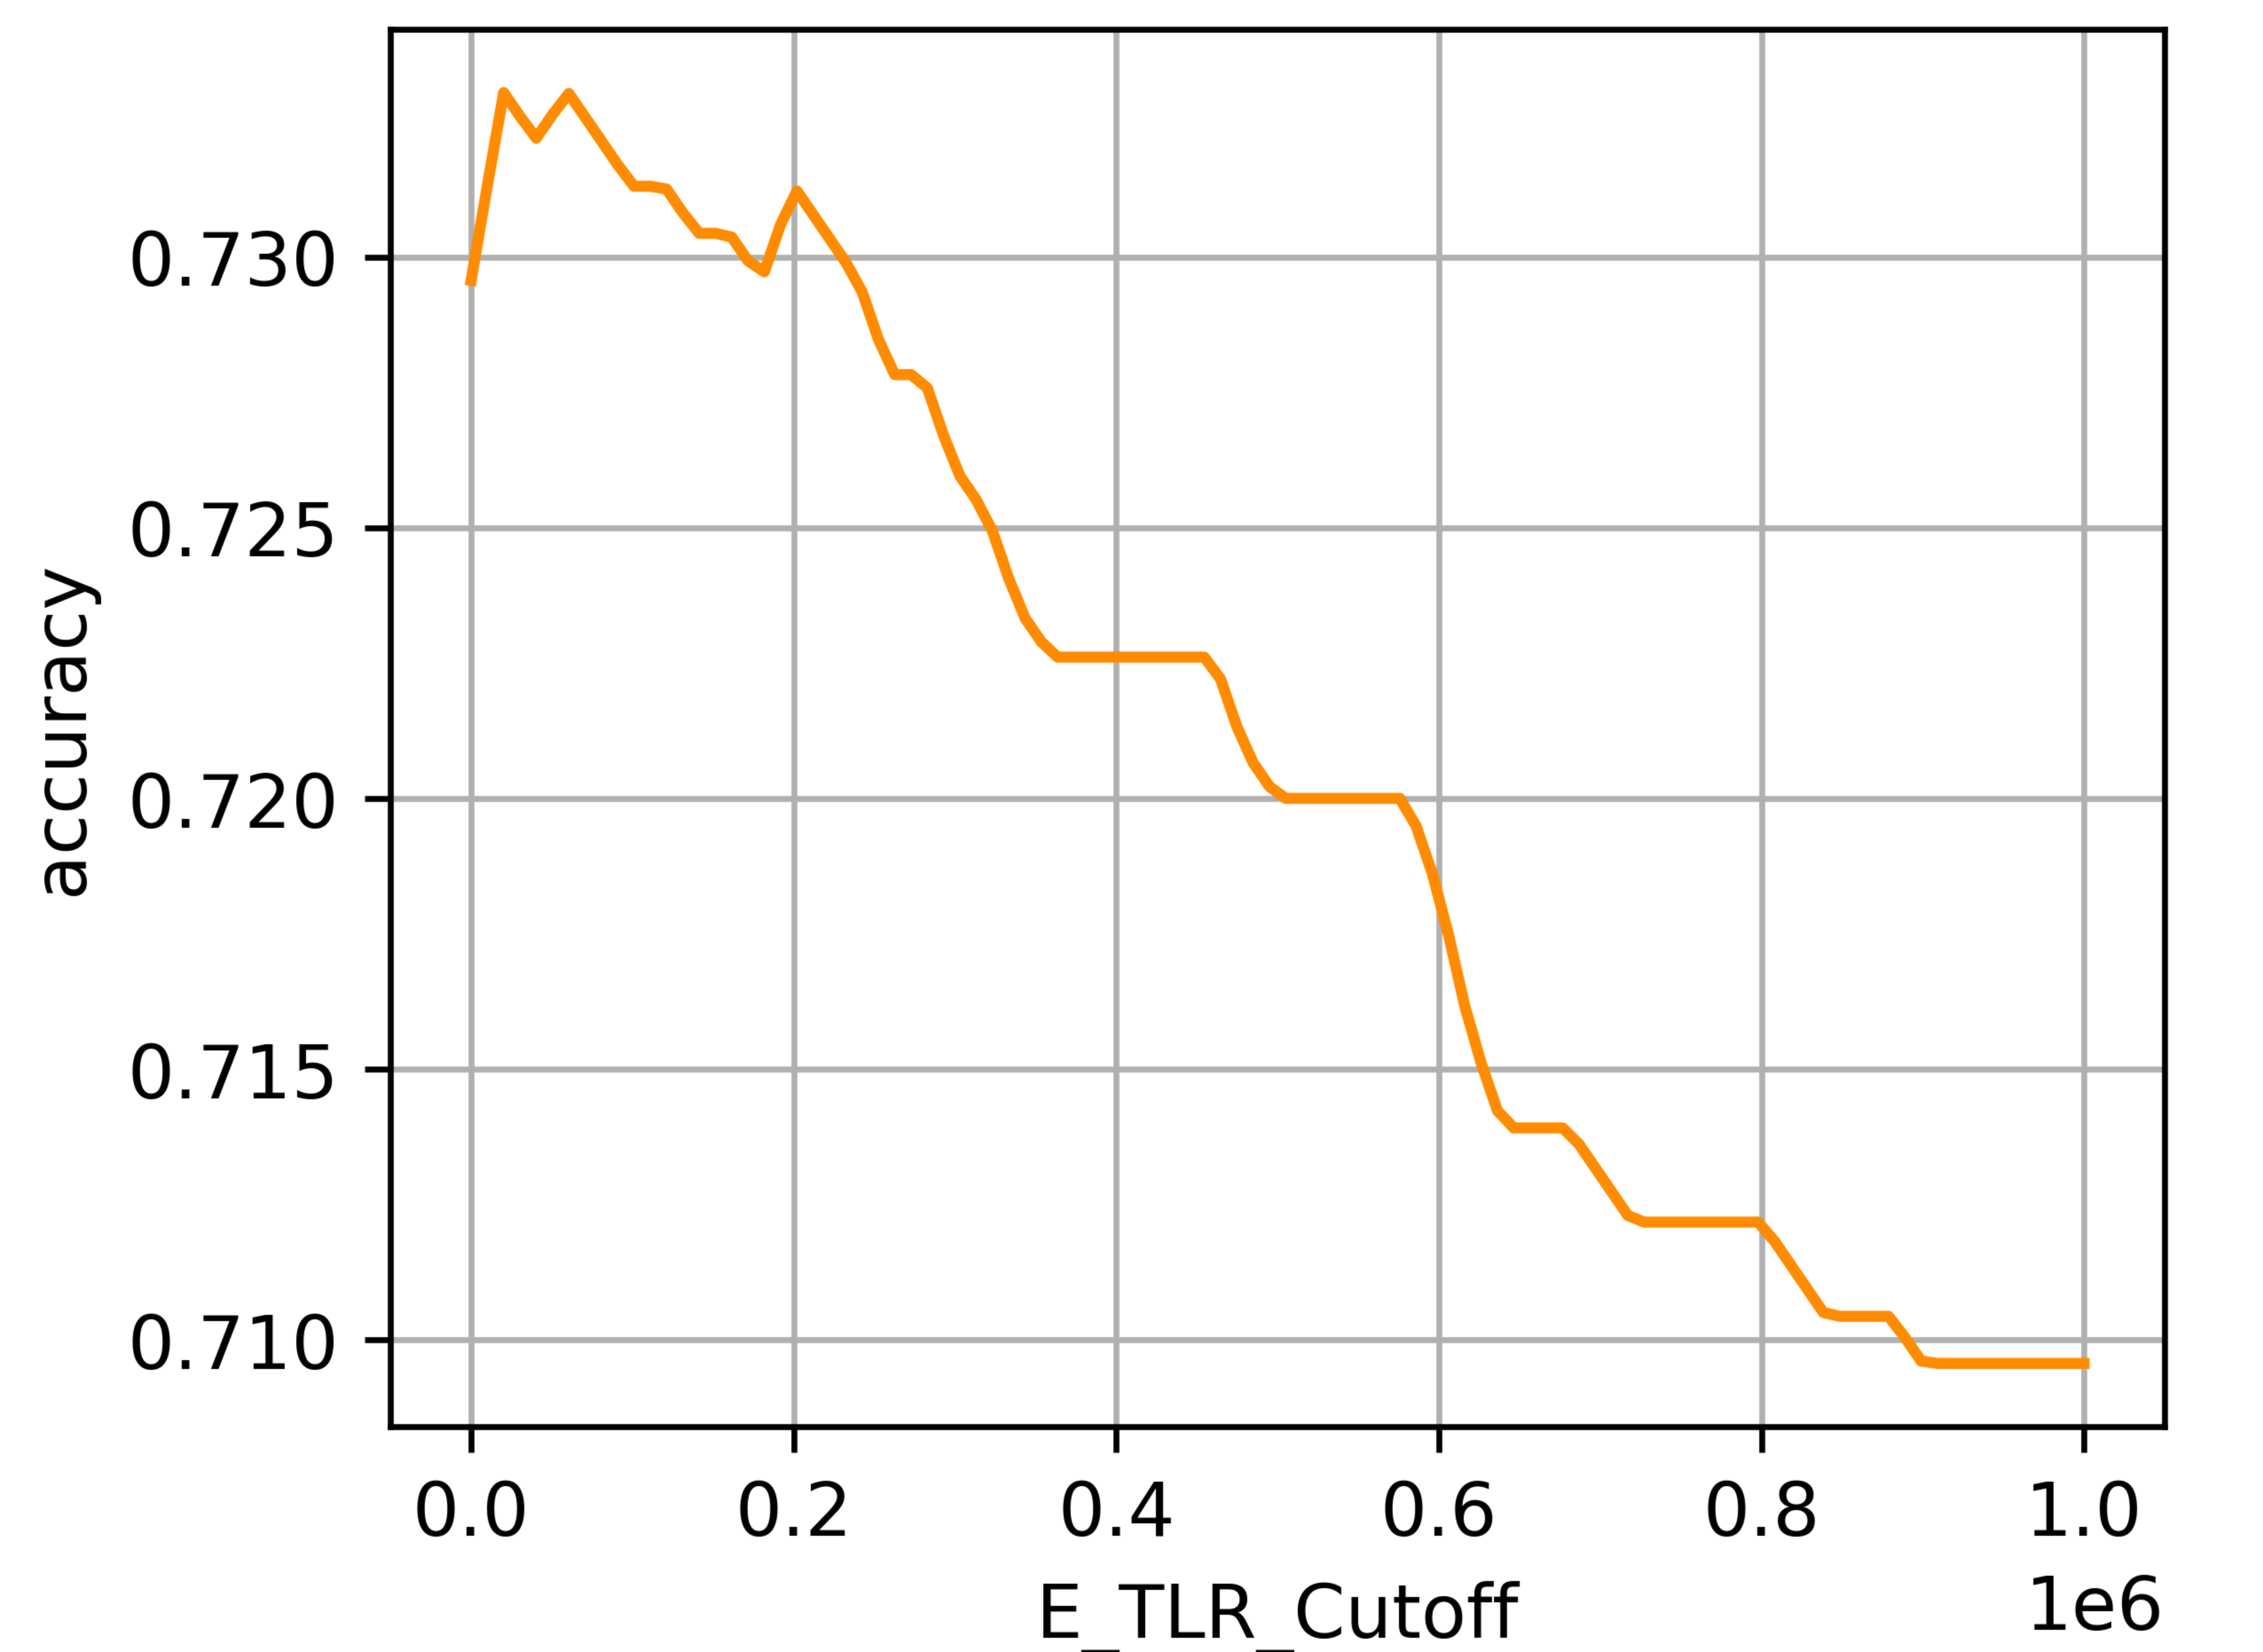

Isi-all

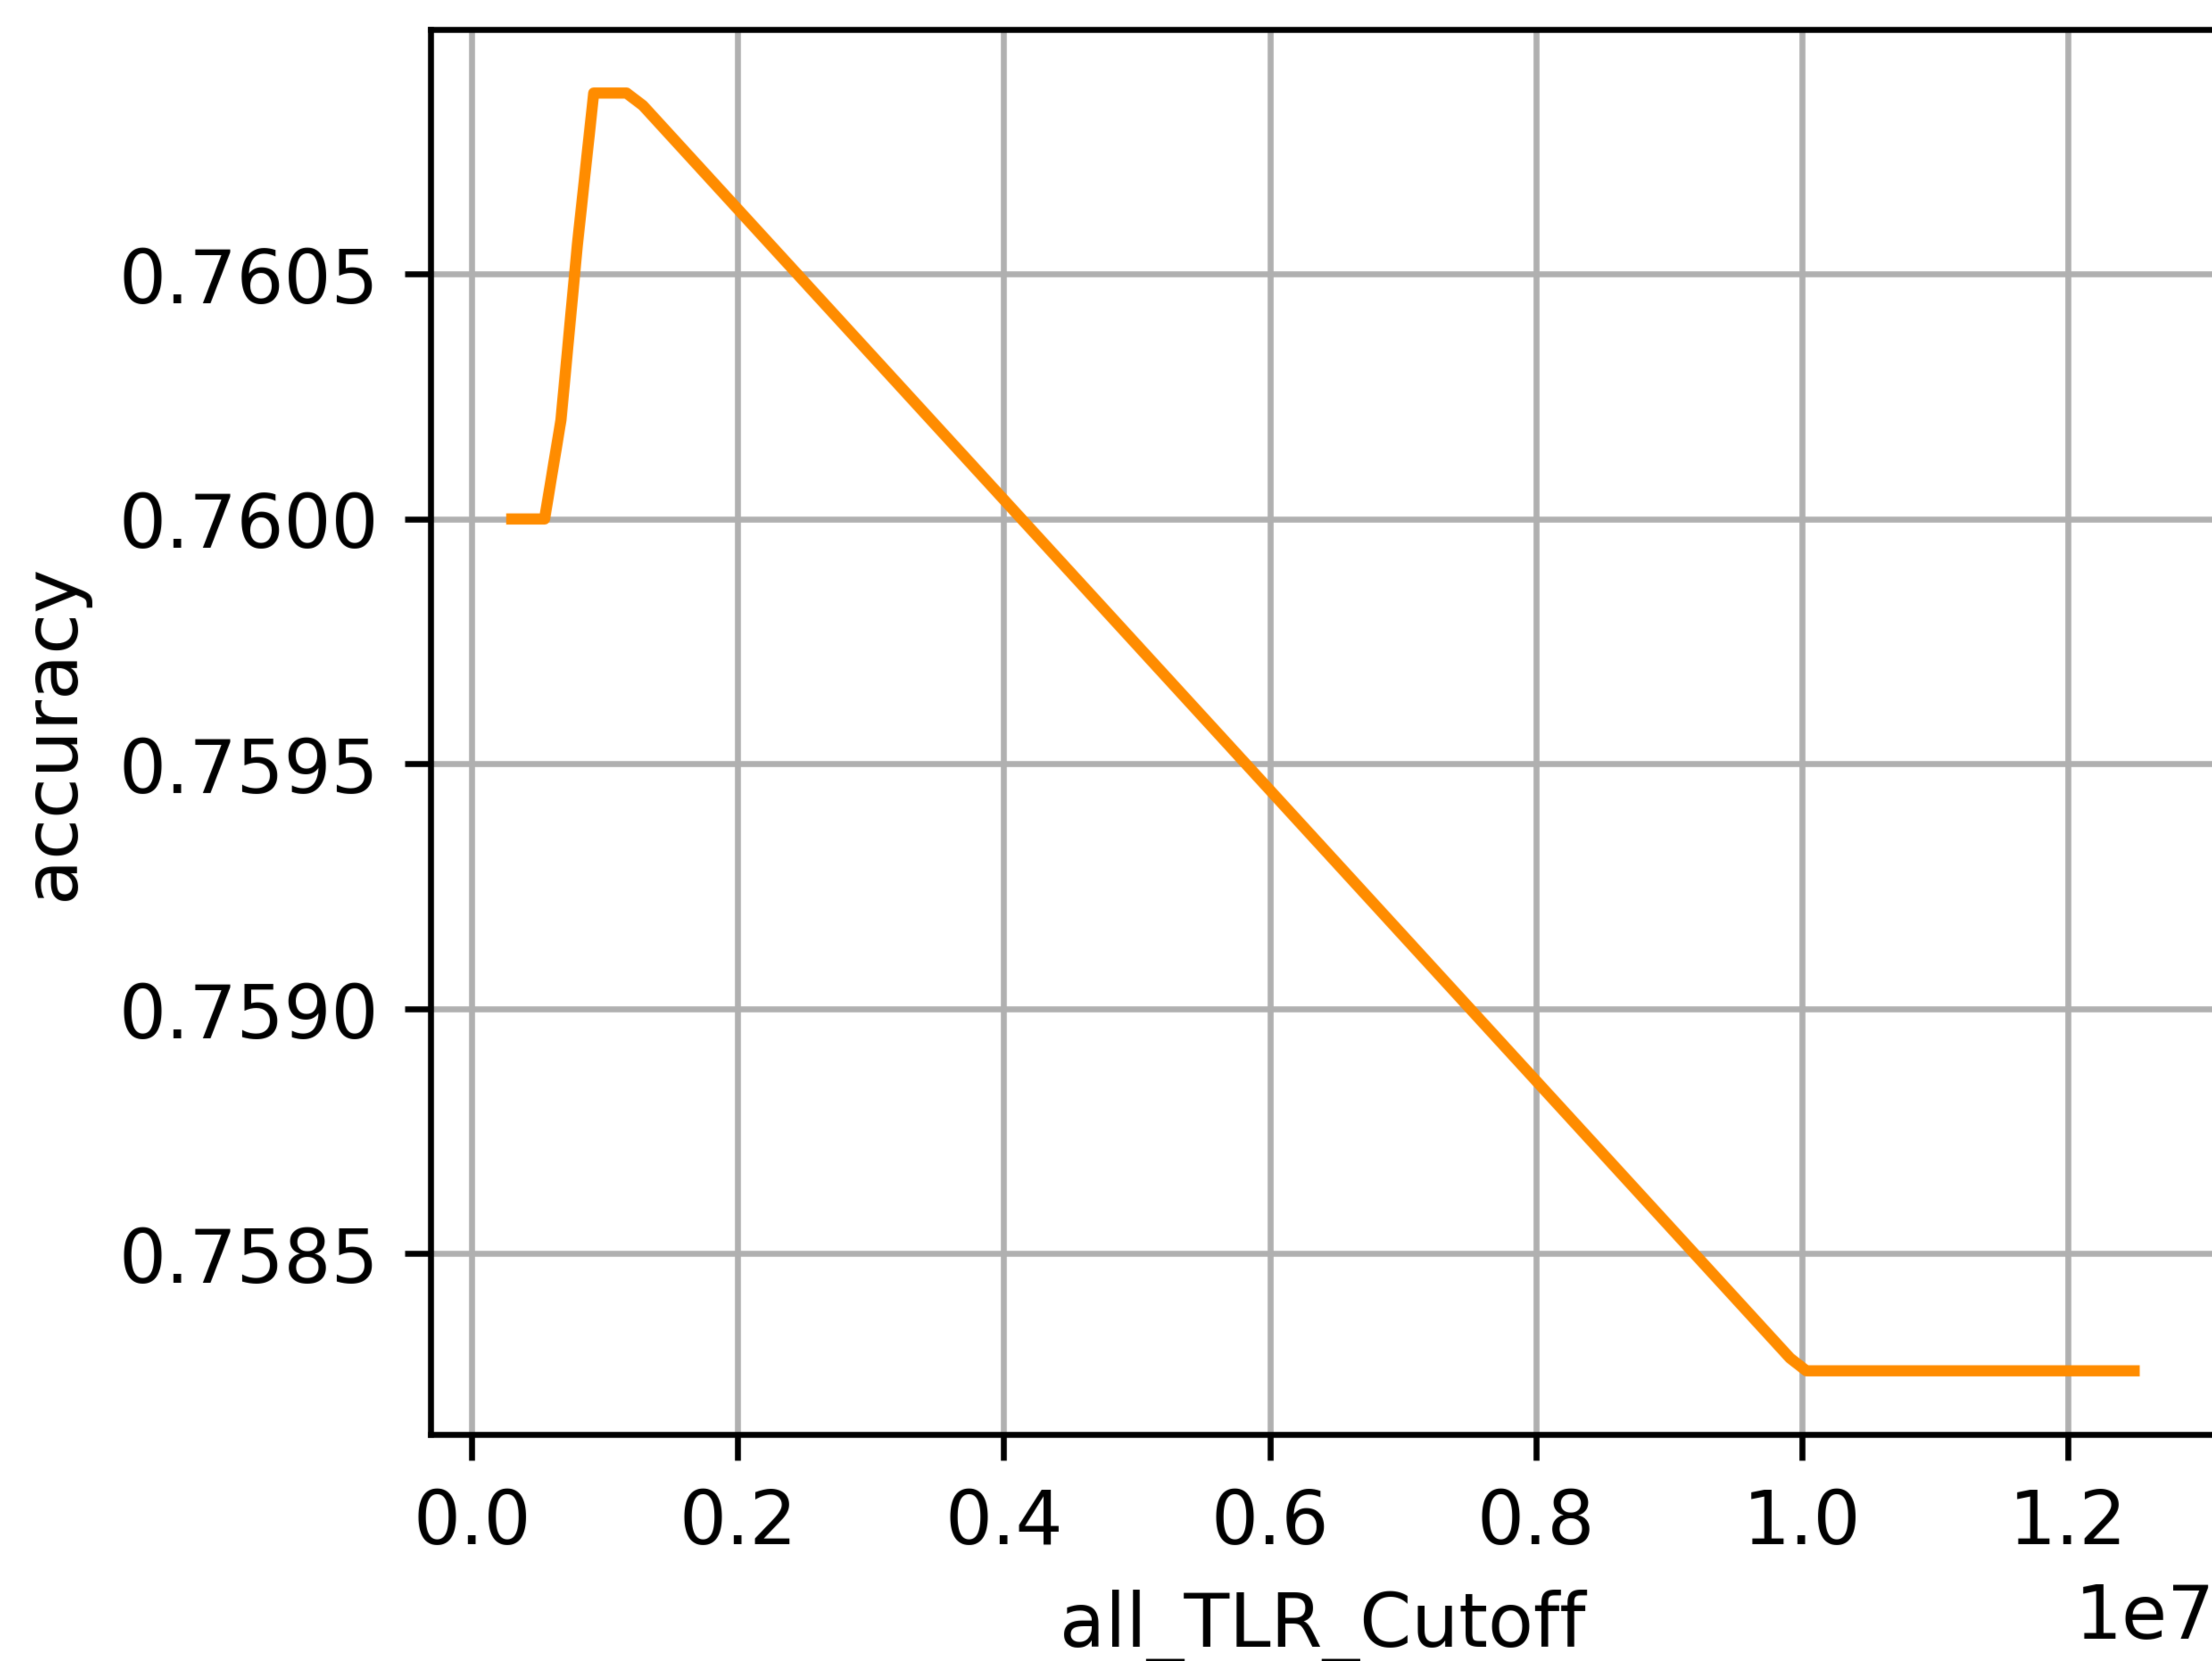

Supplement: d4sc03580a4.pdf [file d4sc03580a4.pdf]

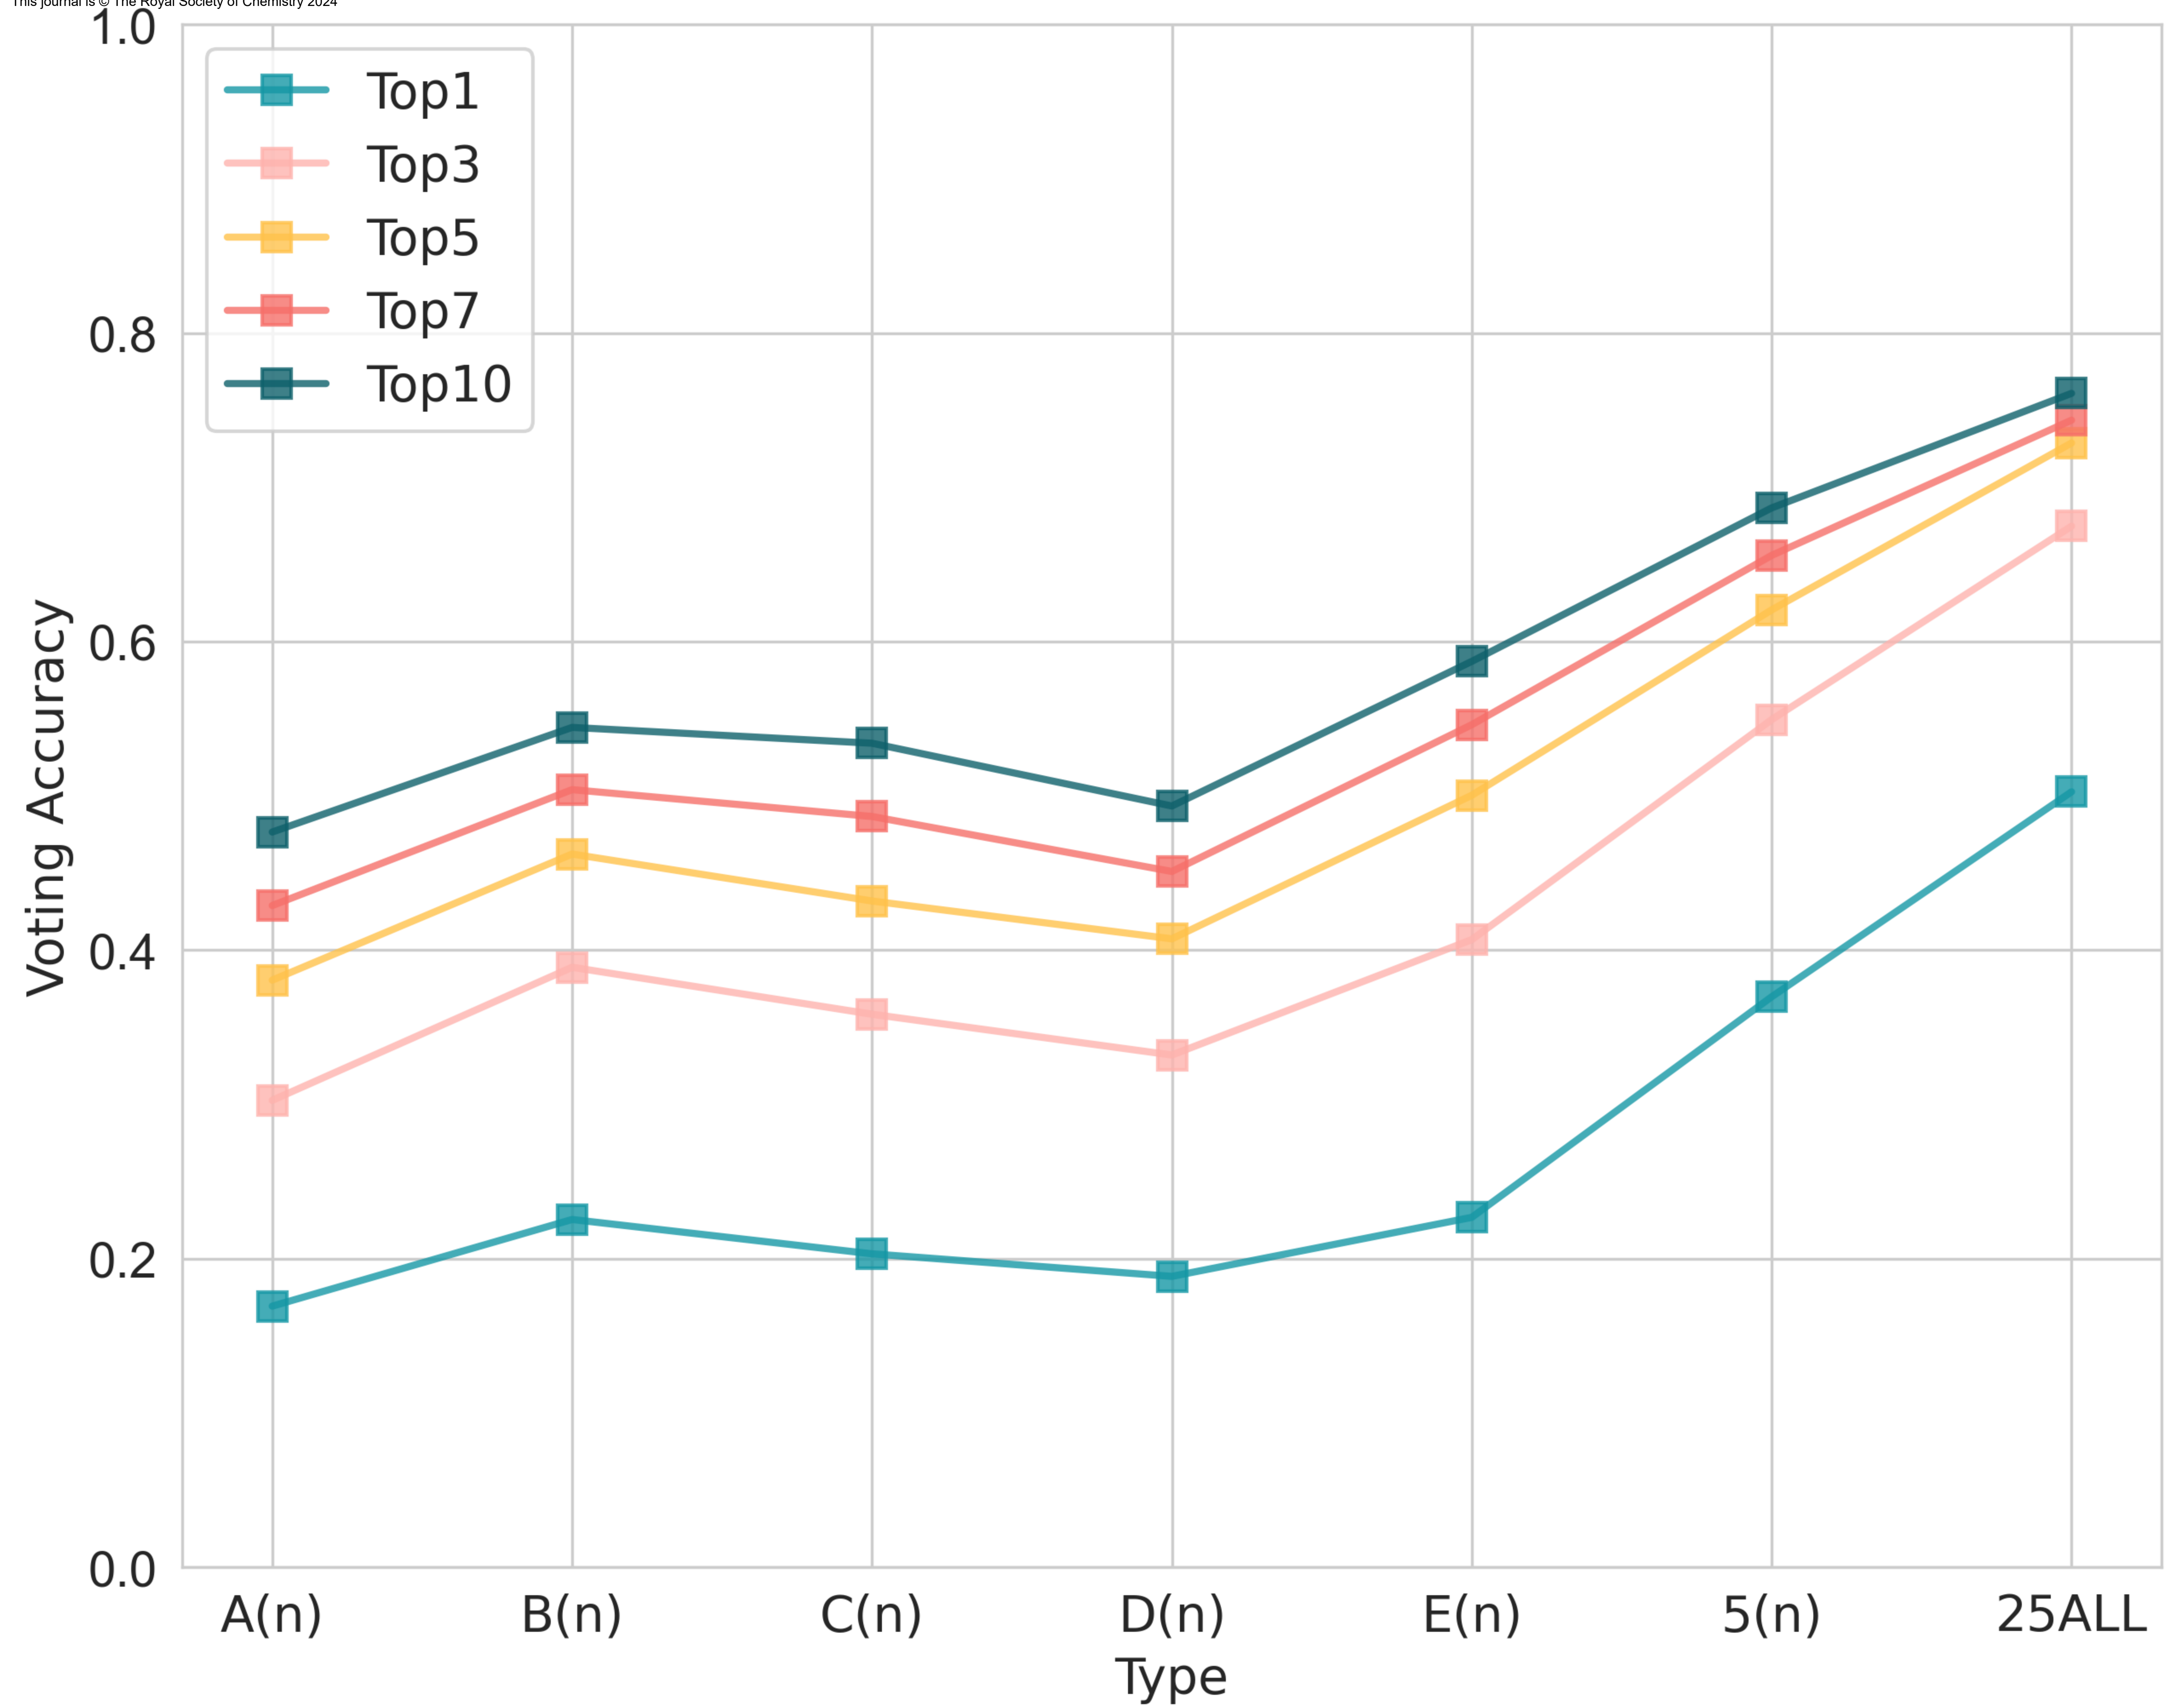

Supplement: d4sc03580a5.pdf [file d4sc03580a5.pdf]

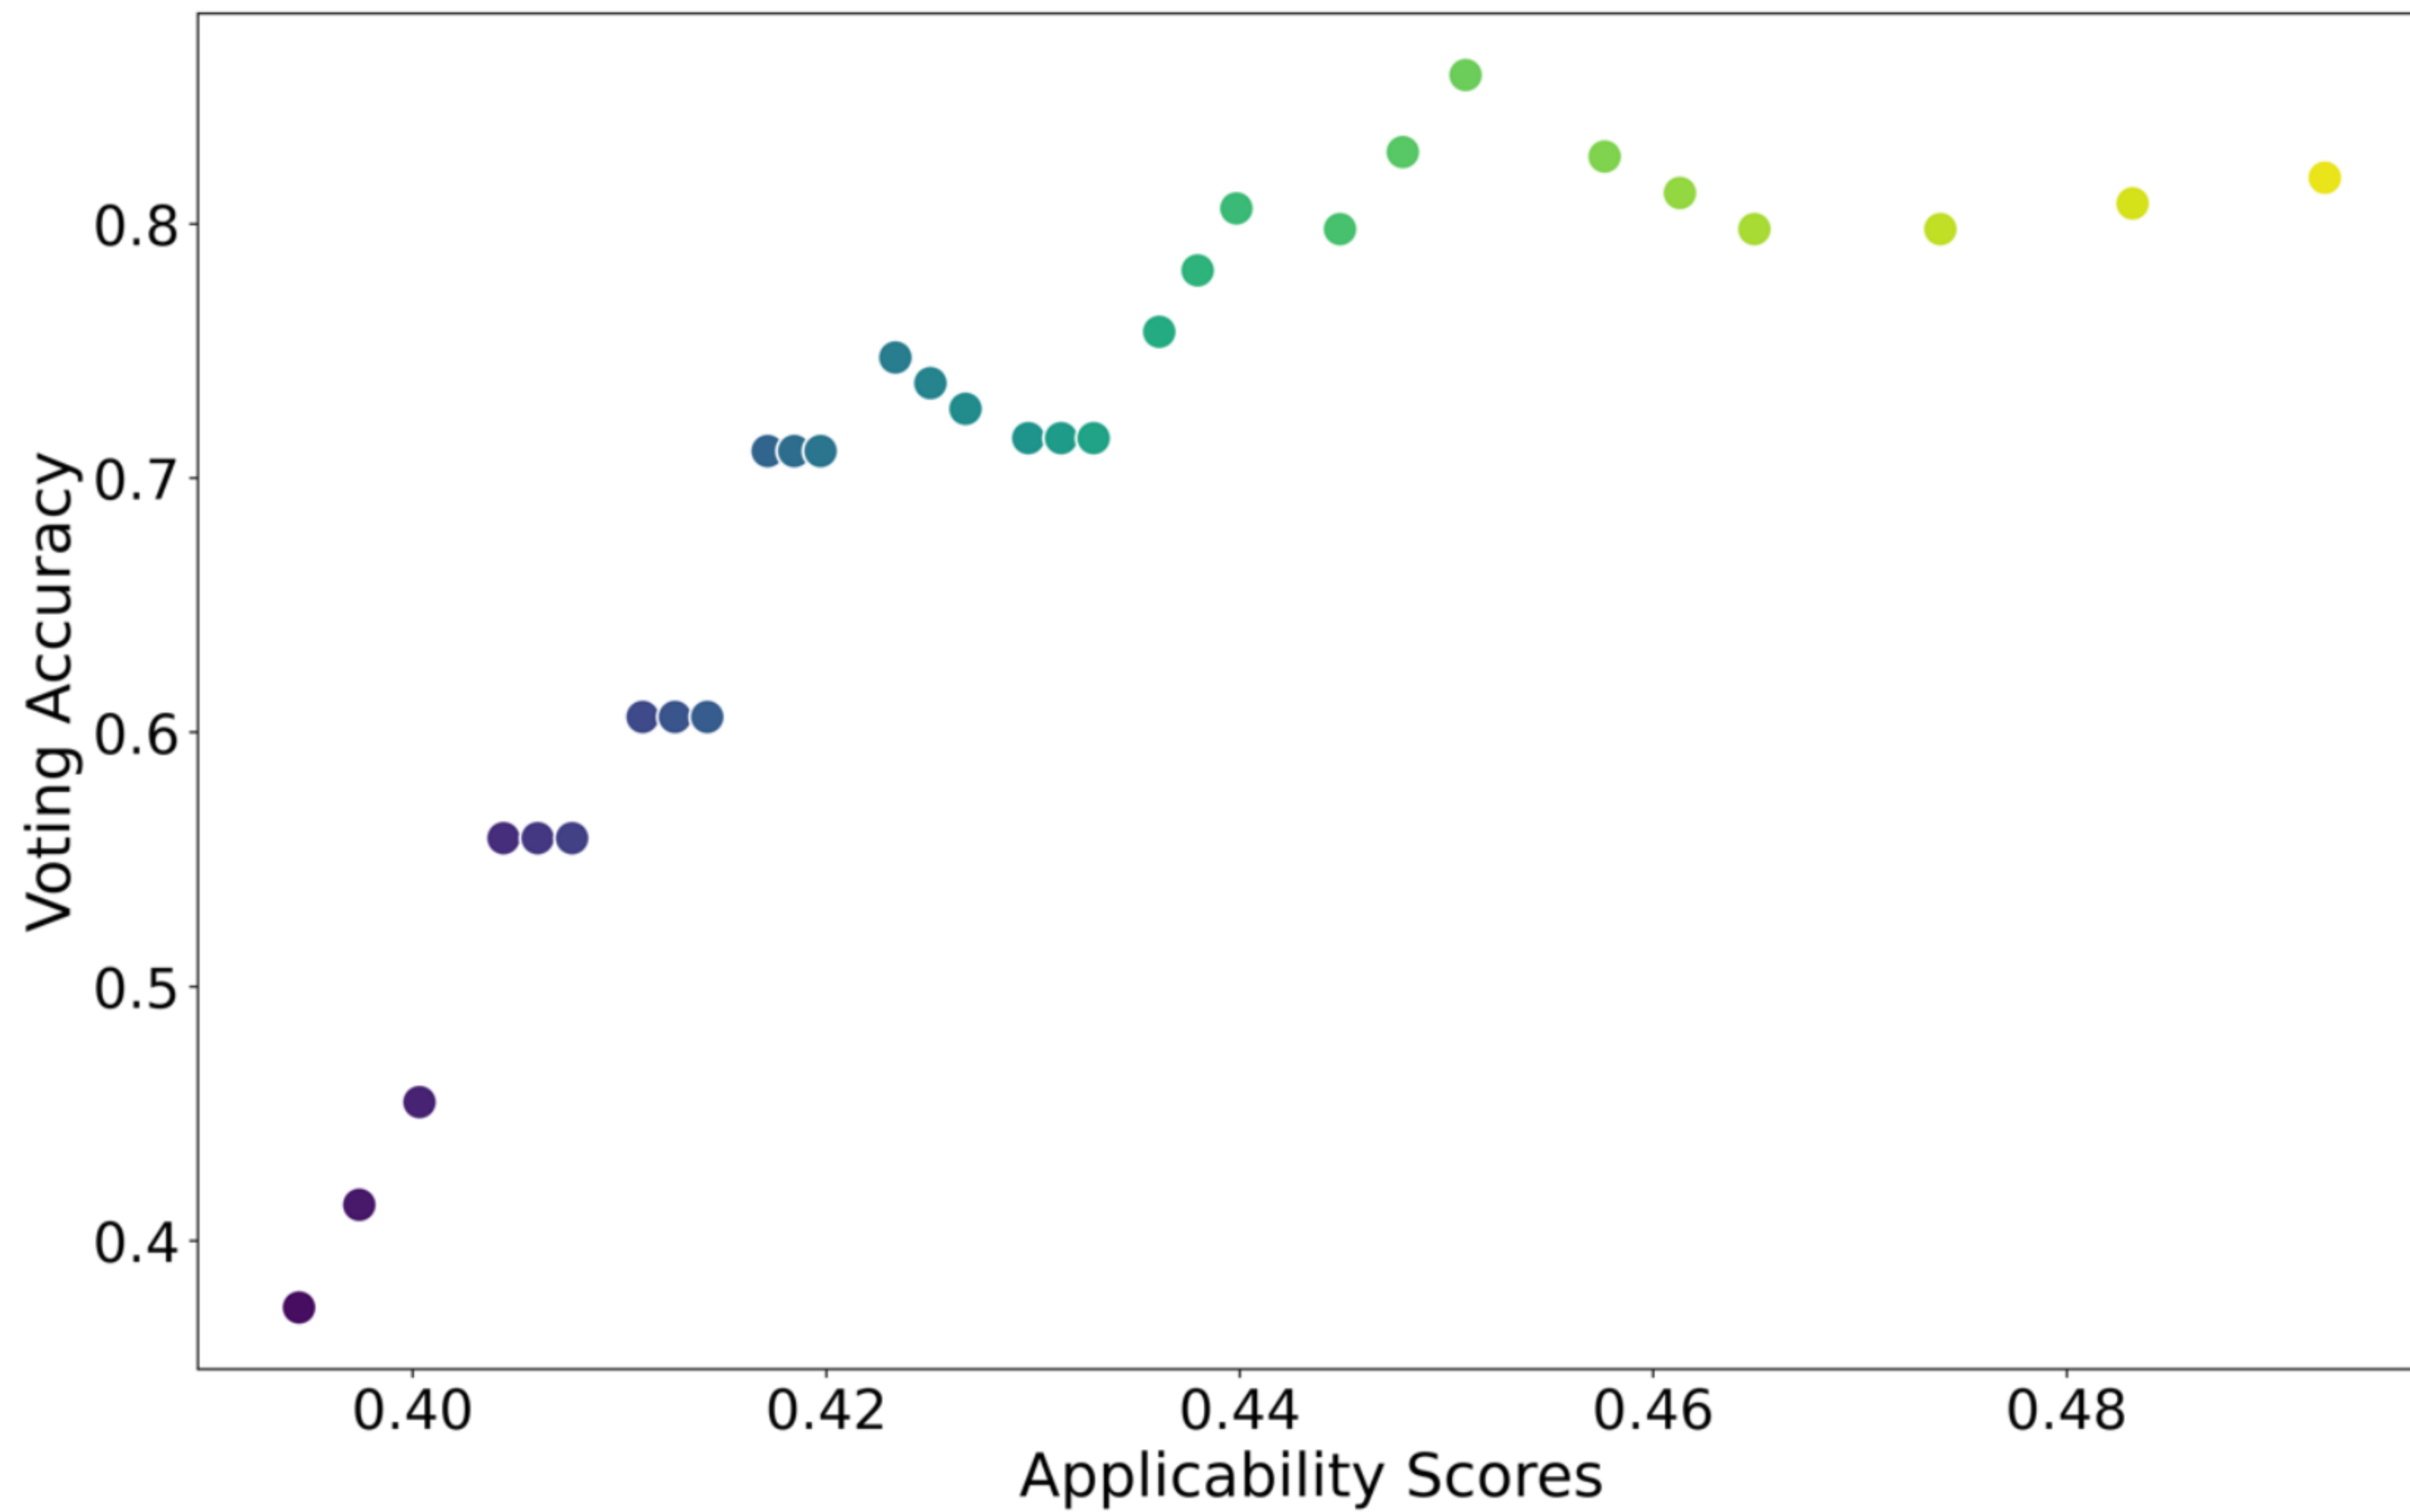

Supplement: d4sc03580a6.pdf [file d4sc03580a6.pdf]
